# Supplementary material for: IPSE, a urogenital parasite-derived immunomodulatory protein, ameliorates ifosfamide-induced hemorrhagic cystitis through downregulation of pro-inflammatory pathways
Source: PubMed Central journal article supplement (PMC6367514; doi:10.1038/s41598-018-38274-z), 2019-02-07
Supplement: 41598_2018_38274_MOESM1_ESM.pdf [file 41598_2018_38274_MOESM1_ESM.pdf]

**IPSE, a urogenital parasite-derived immunomodulatory protein, ameliorates ifosfamide-induced hemorrhagic cystitis through downregulation of pro-inflammatory pathways**

Evaristus C. Mbanefo<sup>1,2</sup>, Loc Le<sup>1</sup>, Rebecca Zee<sup>1,2</sup>, Nirad Banskota<sup>1</sup>, Kenji Ishida<sup>1</sup>, Luke F. Pennington<sup>3</sup>, Justin I. Odegaard<sup>4</sup>, Theodore S. Jardetzky<sup>3</sup>, Abdulaziz Alouffi<sup>5</sup>, Franco H. Falcone<sup>6</sup>, Michael H. Hsieh<sup>1,2,7\*</sup>

**Affiliations**

<sup>1</sup>Bladder Immunology Group, Biomedical Research Institute, Rockville, MD, USA

<sup>2</sup>Division of Urology, Children's National Medical Center, Washington, DC, USA

<sup>3</sup>Department of Structural Biology, Stanford University School of Medicine, Stanford, CA, USA

<sup>4</sup>Guardant Health, Redwood City, CA, USA

<sup>5</sup>Life Science & Environment Sector, King Abdulaziz City for Science & Technology (KACST), Saudi Arabia

<sup>6</sup>Division of Molecular Therapeutics and Formulation, School of Pharmacy, University of Nottingham, UK.

<sup>7</sup>Department of Urology, The George Washington University, Washington, D.C., USA

# INGENUITY<sup>®</sup>

## PATHWAY ANALYSIS

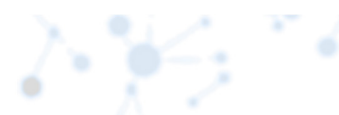

**Supplementary Fig. S1. Summary of the Pathways, Functional and Network analysis using Ingenuity Pathway Analysis (see ref. 57). This file shows top 5 each of canonical pathways, upstream regulators, diseases and disorders, molecular and cellular functions, physiological system development and functions, tox functions (hepatotoxicity, nephrotoxicity and cardiotoxicity), regulator effect networks, mechanistic networks, top 10 upregulated and downregulated genes.**

Analysis Name: Ifos\_vs\_Sal p0.05- 2018-05-10 06:13 PM  
Analysis Creation Date: 2018-06-01  
Build version: 470319M  
Content version: 43605602 (Release Date: 2018-03-28)

### Analysis Settings

Reference set: Ingenuity Knowledge Base (Genes Only)  
Relationship to include: Direct and Indirect  
Includes Endogenous Chemicals  
Optional Analyses: My Pathways My List

Filter Summary:  
Consider only relationships where  
confidence = Experimentally Observed

### Top Canonical Pathways

| Name                                                                           | p-value  | Overlap        |
|--------------------------------------------------------------------------------|----------|----------------|
| Molecular Mechanisms of Cancer                                                 | 6.54E-11 | 45.4 % 179/394 |
| Role of Macrophages, Fibroblasts and Endothelial Cells in Rheumatoid Arthritis | 1.87E-10 | 47.0 % 147/313 |
| Osteoarthritis Pathway                                                         | 1.98E-09 | 49.5 % 105/212 |
| IL-6 Signaling                                                                 | 5.41E-09 | 54.7 % 70/128  |
| Death Receptor Signaling                                                       | 5.60E-09 | 59.1 % 55/93   |

### Top Upstream Regulators

| Upstream Regulator | p-value of overlap | Predicted Activation |
|--------------------|--------------------|----------------------|
| TNF                | 5.90E-29           | Activated            |
| beta-estradiol     | 4.64E-24           | Activated            |
| TGFB1              | 8.46E-23           | Activated            |
| PDGF BB            | 2.89E-21           | Activated            |
| NFKBIA             | 1.14E-19           | Activated            |

### Top Diseases and Bio Functions

#### Diseases and Disorders

| Name                                | p-value              | #Molecules |
|-------------------------------------|----------------------|------------|
| Cancer                              | 9.96E-09 - 3.77E-157 | 6084       |
| Organismal Injury and Abnormalities | 9.96E-09 - 3.77E-157 | 6207       |
| Gastrointestinal Disease            | 5.18E-09 - 2.21E-134 | 5630       |
| Hepatic System Disease              | 4.36E-09 - 5.09E-44  | 3964       |
| Reproductive System Disease         | 9.38E-09 - 2.35E-31  | 3788       |

#### Molecular and Cellular Functions

| Name                    | p-value             | #Molecules |
|-------------------------|---------------------|------------|
| Cell Death and Survival | 7.49E-09 - 5.07E-46 | 2138       |
| Cellular Movement       | 8.05E-09 - 2.03E-34 | 1415       |
| Gene Expression         | 4.12E-12 - 2.97E-26 | 1469       |
| Cell Cycle              | 1.06E-08 - 5.19E-24 | 937        |
| Cellular Development    | 1.04E-08 - 1.75E-23 | 1982       |

### Physiological System Development and Function

| Name                                           | p-value             | #Molecules |
|------------------------------------------------|---------------------|------------|
| Organismal Survival                            | 7.31E-11 - 3.36E-58 | 1638       |
| Organismal Development                         | 5.68E-09 - 1.52E-42 | 2357       |
| Tissue Morphology                              | 9.09E-09 - 4.09E-37 | 1581       |
| Hematological System Development and Function  | 9.09E-09 - 2.20E-28 | 1267       |
| Cardiovascular System Development and Function | 7.49E-09 - 2.20E-25 | 921        |

### Top Tox Functions

#### Assays: Clinical Chemistry and Hematology

| Name                                     | p-value             | #Molecules |
|------------------------------------------|---------------------|------------|
| Increased Levels of Alkaline Phosphatase | 3.01E-01 - 5.09E-07 | 46         |
| Increased Levels of ALT                  | 2.57E-01 - 1.97E-03 | 20         |
| Increased Levels of AST                  | 3.01E-01 - 2.13E-03 | 14         |
| Increased Levels of Creatinine           | 2.21E-01 - 2.82E-03 | 26         |
| Increased Levels of Red Blood Cells      | 1.32E-02 - 1.32E-02 | 42         |

#### Cardiotoxicity

| Name                        | p-value             | #Molecules |
|-----------------------------|---------------------|------------|
| Cardiac Infarction          | 5.11E-01 - 4.35E-06 | 117        |
| Cardiac Necrosis/Cell Death | 6.58E-01 - 6.01E-06 | 120        |
| Cardiac Arrythmia           | 1.00E00 - 7.57E-06  | 119        |
| Cardiac Enlargement         | 6.58E-01 - 9.71E-06 | 183        |
| Cardiac Arteriopathy        | 5.81E-01 - 1.62E-04 | 149        |

**Hepatotoxicity**

| Name                                 | p-value             | #Molecules |
|--------------------------------------|---------------------|------------|
| Liver Hyperplasia/Hyperproliferation | 1.00E00 - 6.99E-38  | 3855       |
| Liver Necrosis/Cell Death            | 5.11E-01 - 3.88E-11 | 147        |
| Liver Proliferation                  | 5.11E-01 - 4.65E-10 | 114        |
| Hepatocellular Carcinoma             | 6.58E-01 - 7.21E-08 | 439        |
| Liver Cirrhosis                      | 5.11E-01 - 1.00E-04 | 115        |

**Nephrotoxicity**

| Name                      | p-value             | #Molecules |
|---------------------------|---------------------|------------|
| Renal Proliferation       | 6.58E-01 - 8.00E-10 | 136        |
| Renal Necrosis/Cell Death | 6.58E-01 - 2.88E-08 | 239        |
| Renal Damage              | 6.58E-01 - 1.50E-06 | 124        |
| Glomerular Injury         | 1.00E00 - 1.41E-04  | 131        |
| Renal Hypoplasia          | 5.11E-01 - 2.13E-04 | 36         |

**Top Regulator Effect Networks**

| ID | Regulators                   | Diseases & Functions        | Consistency Score |
|----|------------------------------|-----------------------------|-------------------|
| 1  | C3                           | Interaction of leukocytes   | 4.364             |
| 2  | trinitrobenzenesulfonic acid | Chemotaxis of myeloid cells | 4.041             |

|   |       |                            |       |
|---|-------|----------------------------|-------|
| 3 | TAC1  | Recruitment of blood cells | 3.9   |
| 4 | MIF   | Migration of granulocytes  | 3.881 |
| 5 | C5AR1 | Homing of cells            | 3.873 |

### Top Networks

| ID | Associated Network Functions                                                                             | Score |
|----|----------------------------------------------------------------------------------------------------------|-------|
| 1  | Vitamin and Mineral Metabolism, Cell Cycle, Cellular Assembly and Organization                           | 23    |
| 2  | Hereditary Disorder, Ophthalmic Disease, Organismal Injury and Abnormalities                             | 23    |
| 3  | Connective Tissue Disorders, Developmental Disorder, Hereditary Disorder                                 | 23    |
| 4  | Gene Expression, Auditory and Vestibular System Development and Function, Cancer                         | 23    |
| 5  | Cell-To-Cell Signaling and Interaction, Cellular Movement, Hematological System Development and Function | 23    |

### Top Tox Lists

| Name                                           | p-value  | Overlap        |
|------------------------------------------------|----------|----------------|
| Renal Necrosis/Cell Death                      | 1.25E-11 | 43.5 % 239/550 |
| Liver Necrosis/Cell Death                      | 5.88E-11 | 47.6 % 147/309 |
| Liver Proliferation                            | 3.63E-10 | 49.2 % 118/240 |
| Increases Liver Hyperplasia/Hyperproliferation | 7.65E-09 | 54.8 % 68/124  |
| Increases Renal Proliferation                  | 1.16E-07 | 50.7 % 75/148  |

### Top Analysis-Ready Molecules

#### Expr Log Ratio up-regulated

| Molecules      | Expr. Value | Expr. Chart |
|----------------|-------------|-------------|
| <b>EID3</b>    | ↑ 6.792     |             |
| <b>PTX3</b>    | ↑ 6.737     |             |
| <b>IL6</b>     | ↑ 6.583     |             |
| <b>HMOX1</b>   | ↑ 6.122     |             |
| <b>SLC7A11</b> | ↑ 6.111     |             |

|                |         |
|----------------|---------|
| <b>CXCL3</b>   | ↑ 6.011 |
| <b>TMEM236</b> | ↑ 5.660 |
| <b>ADAMTS4</b> | ↑ 5.632 |
| <b>LSMEM1</b>  | ↑ 5.482 |
| <b>Mt2</b>     | ↑ 5.407 |

**Expr Log Ratio down-regulated**

| Molecules            | Expr. Value | Expr. Chart |
|----------------------|-------------|-------------|
| <b>CX3CR1</b>        | ↓ -3.487    |             |
| <b>Tlr12</b>         | ↓ -3.468    |             |
| <b>TMEM229A</b>      | ↓ -2.901    |             |
| <b>NDP</b>           | ↓ -2.891    |             |
| <b>CYP1A1</b>        | ↓ -2.633    |             |
| <b>FZD10</b>         | ↓ -2.549    |             |
| <b>2010016I18Rik</b> | ↓ -2.544    |             |
| <b>C130021I20Rik</b> | ↓ -2.508    |             |
| <b>WSCD1</b>         | ↓ -2.494    |             |
| <b>CLEC12A</b>       | ↓ -2.450    |             |

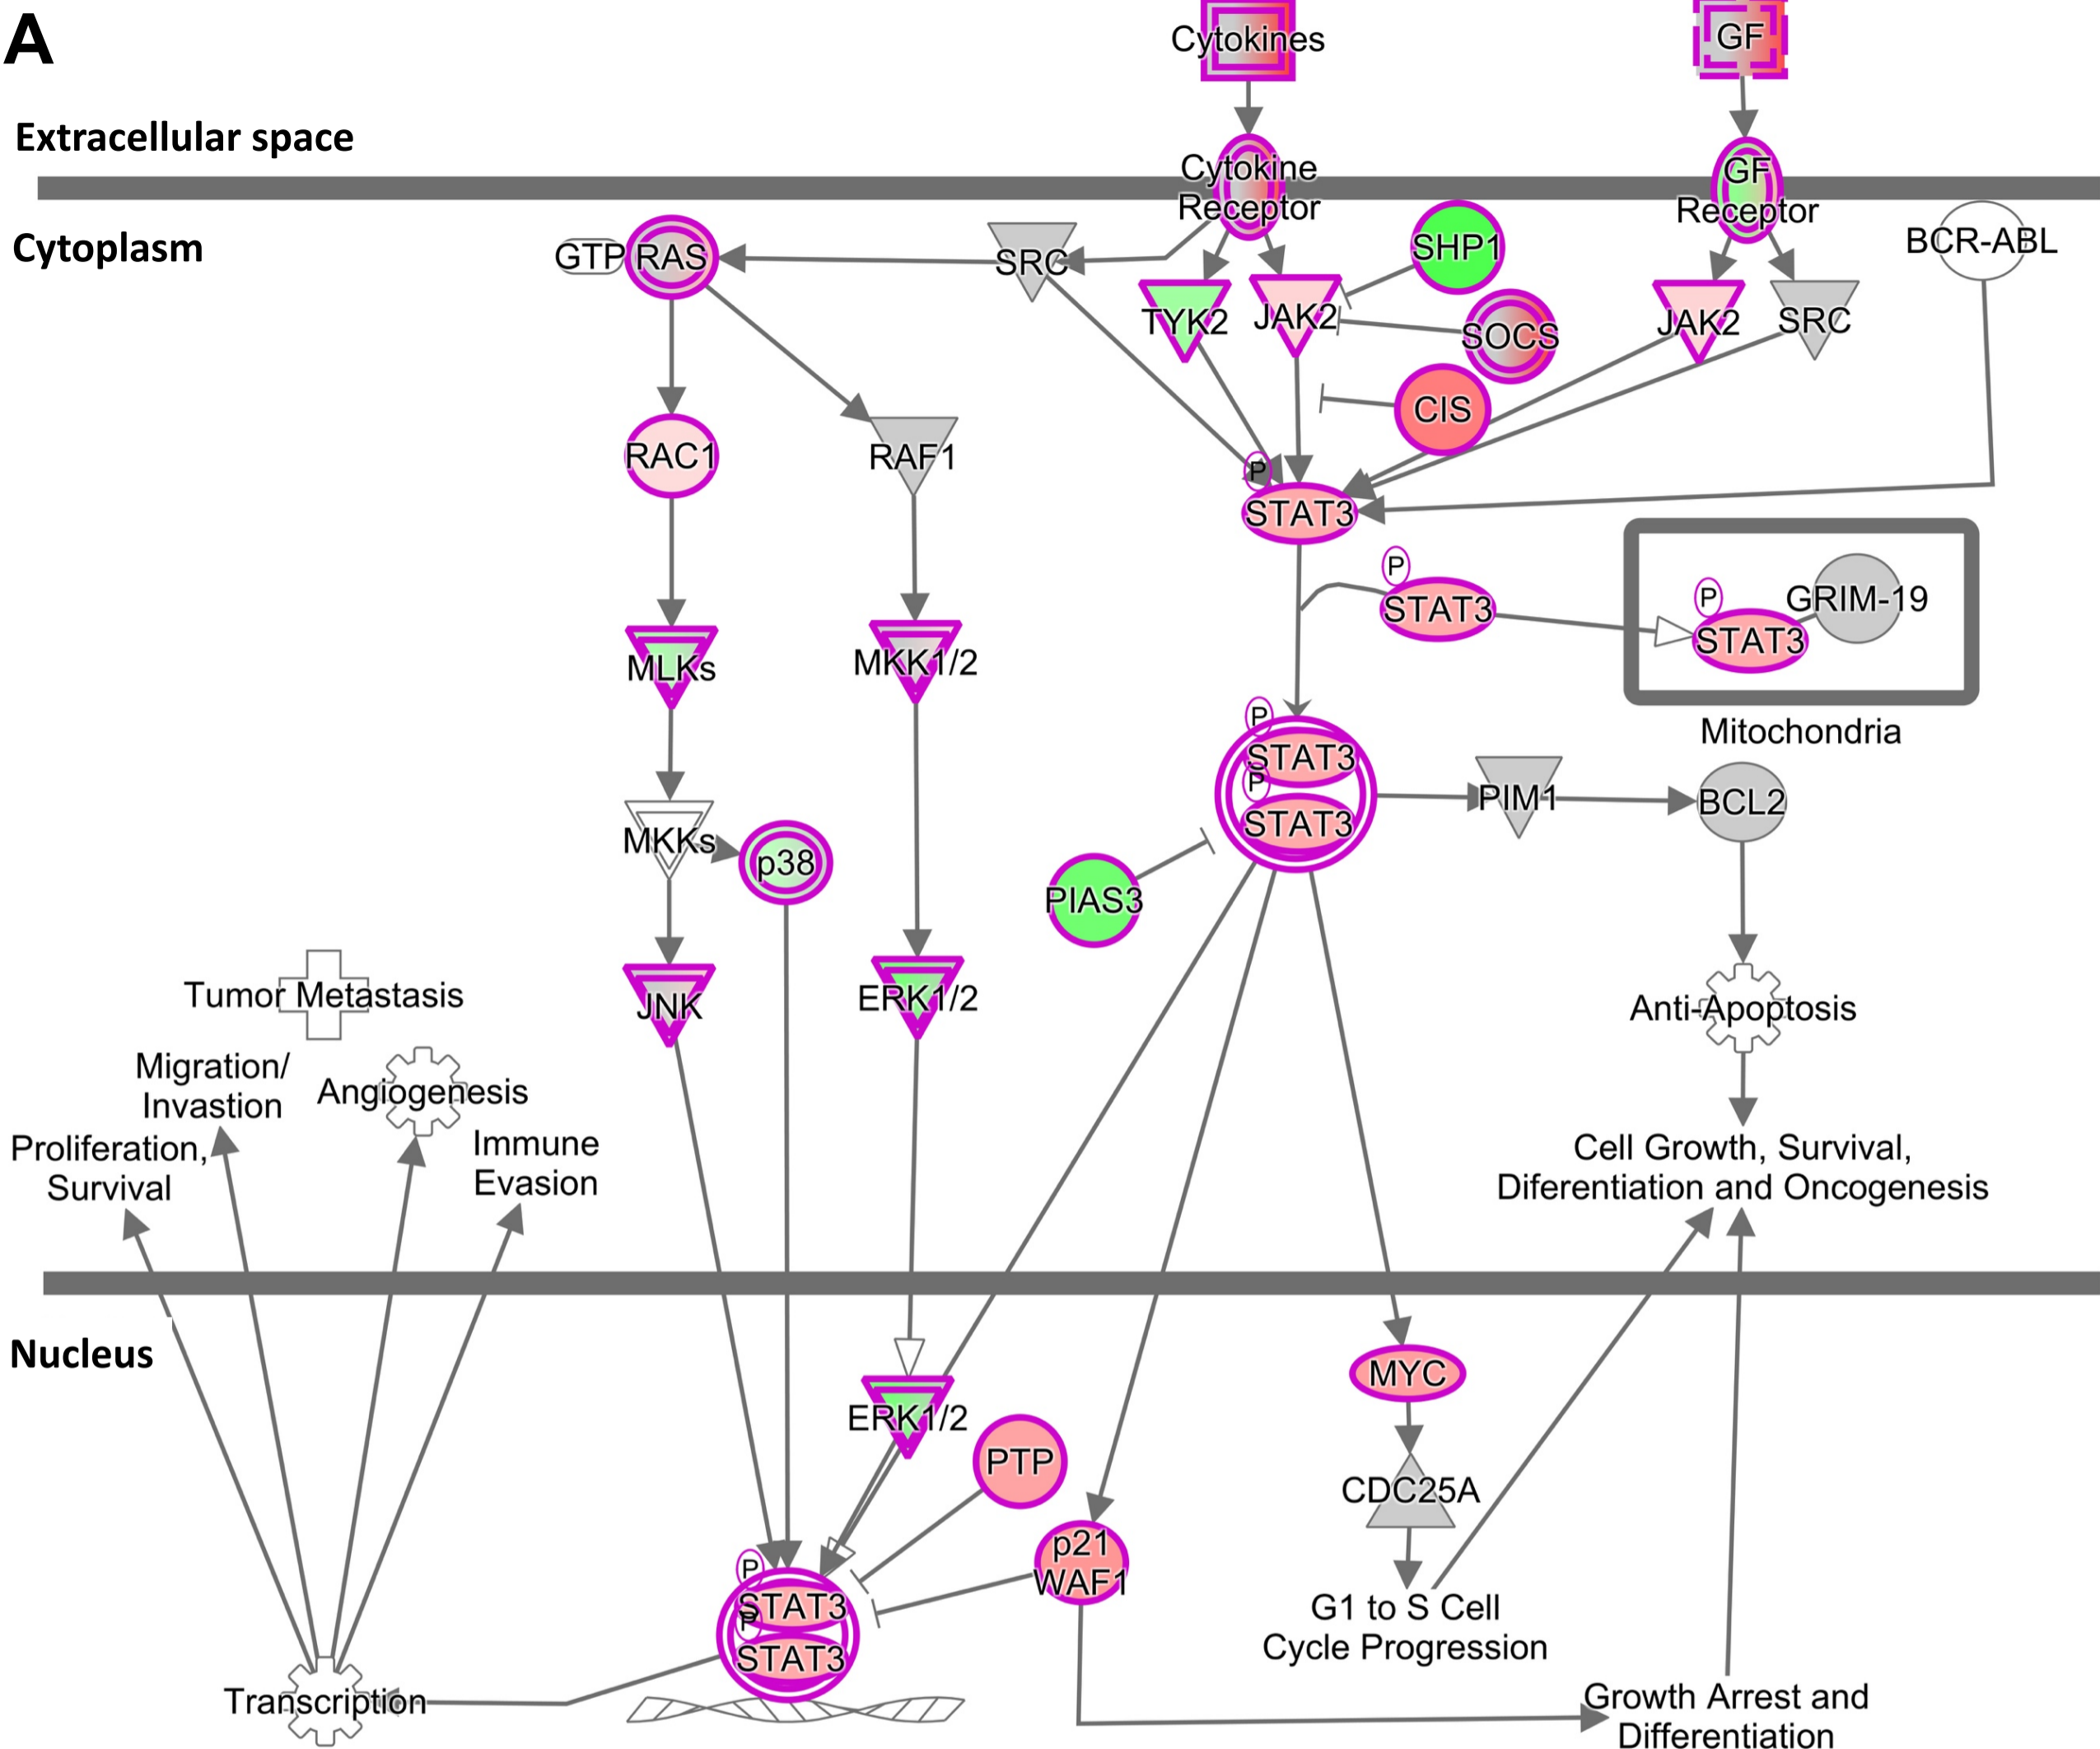

**Supplementary Fig. S2. Major upregulated pro-inflammatory pathways during ifosfamide induced hemorrhagic cystitis.** Pathways, Functional and Network analyses were generated using IPA<sup>57</sup>. Following ifosfamide injection and acrolein induced urotoxicity, there was upregulation of upstream cytokines (IL-6, IL-1 $\beta$  and TNF $\alpha$ ), their receptors, adaptor proteins, protein kinases and nuclear transcriptional factor (STAT3 and NF $\kappa$ B) in the **(A)** STAT3 pathway and **(B)** NF $\kappa$ B pathway. Keys: upregulation (red), downregulation (green), cytokines (square), growth factors (dotted square), phosphatase (triangle), kinases (inverted triangle), transmembrane receptors (ellipse), transcriptional regulators (wide circle), peptidase (rhombus), group or complex (double lined shapes), transporter (trapezium), acts on (line with filled arrow), translocate (line with open arrow), inhibition (line with perpendicular line at edge).

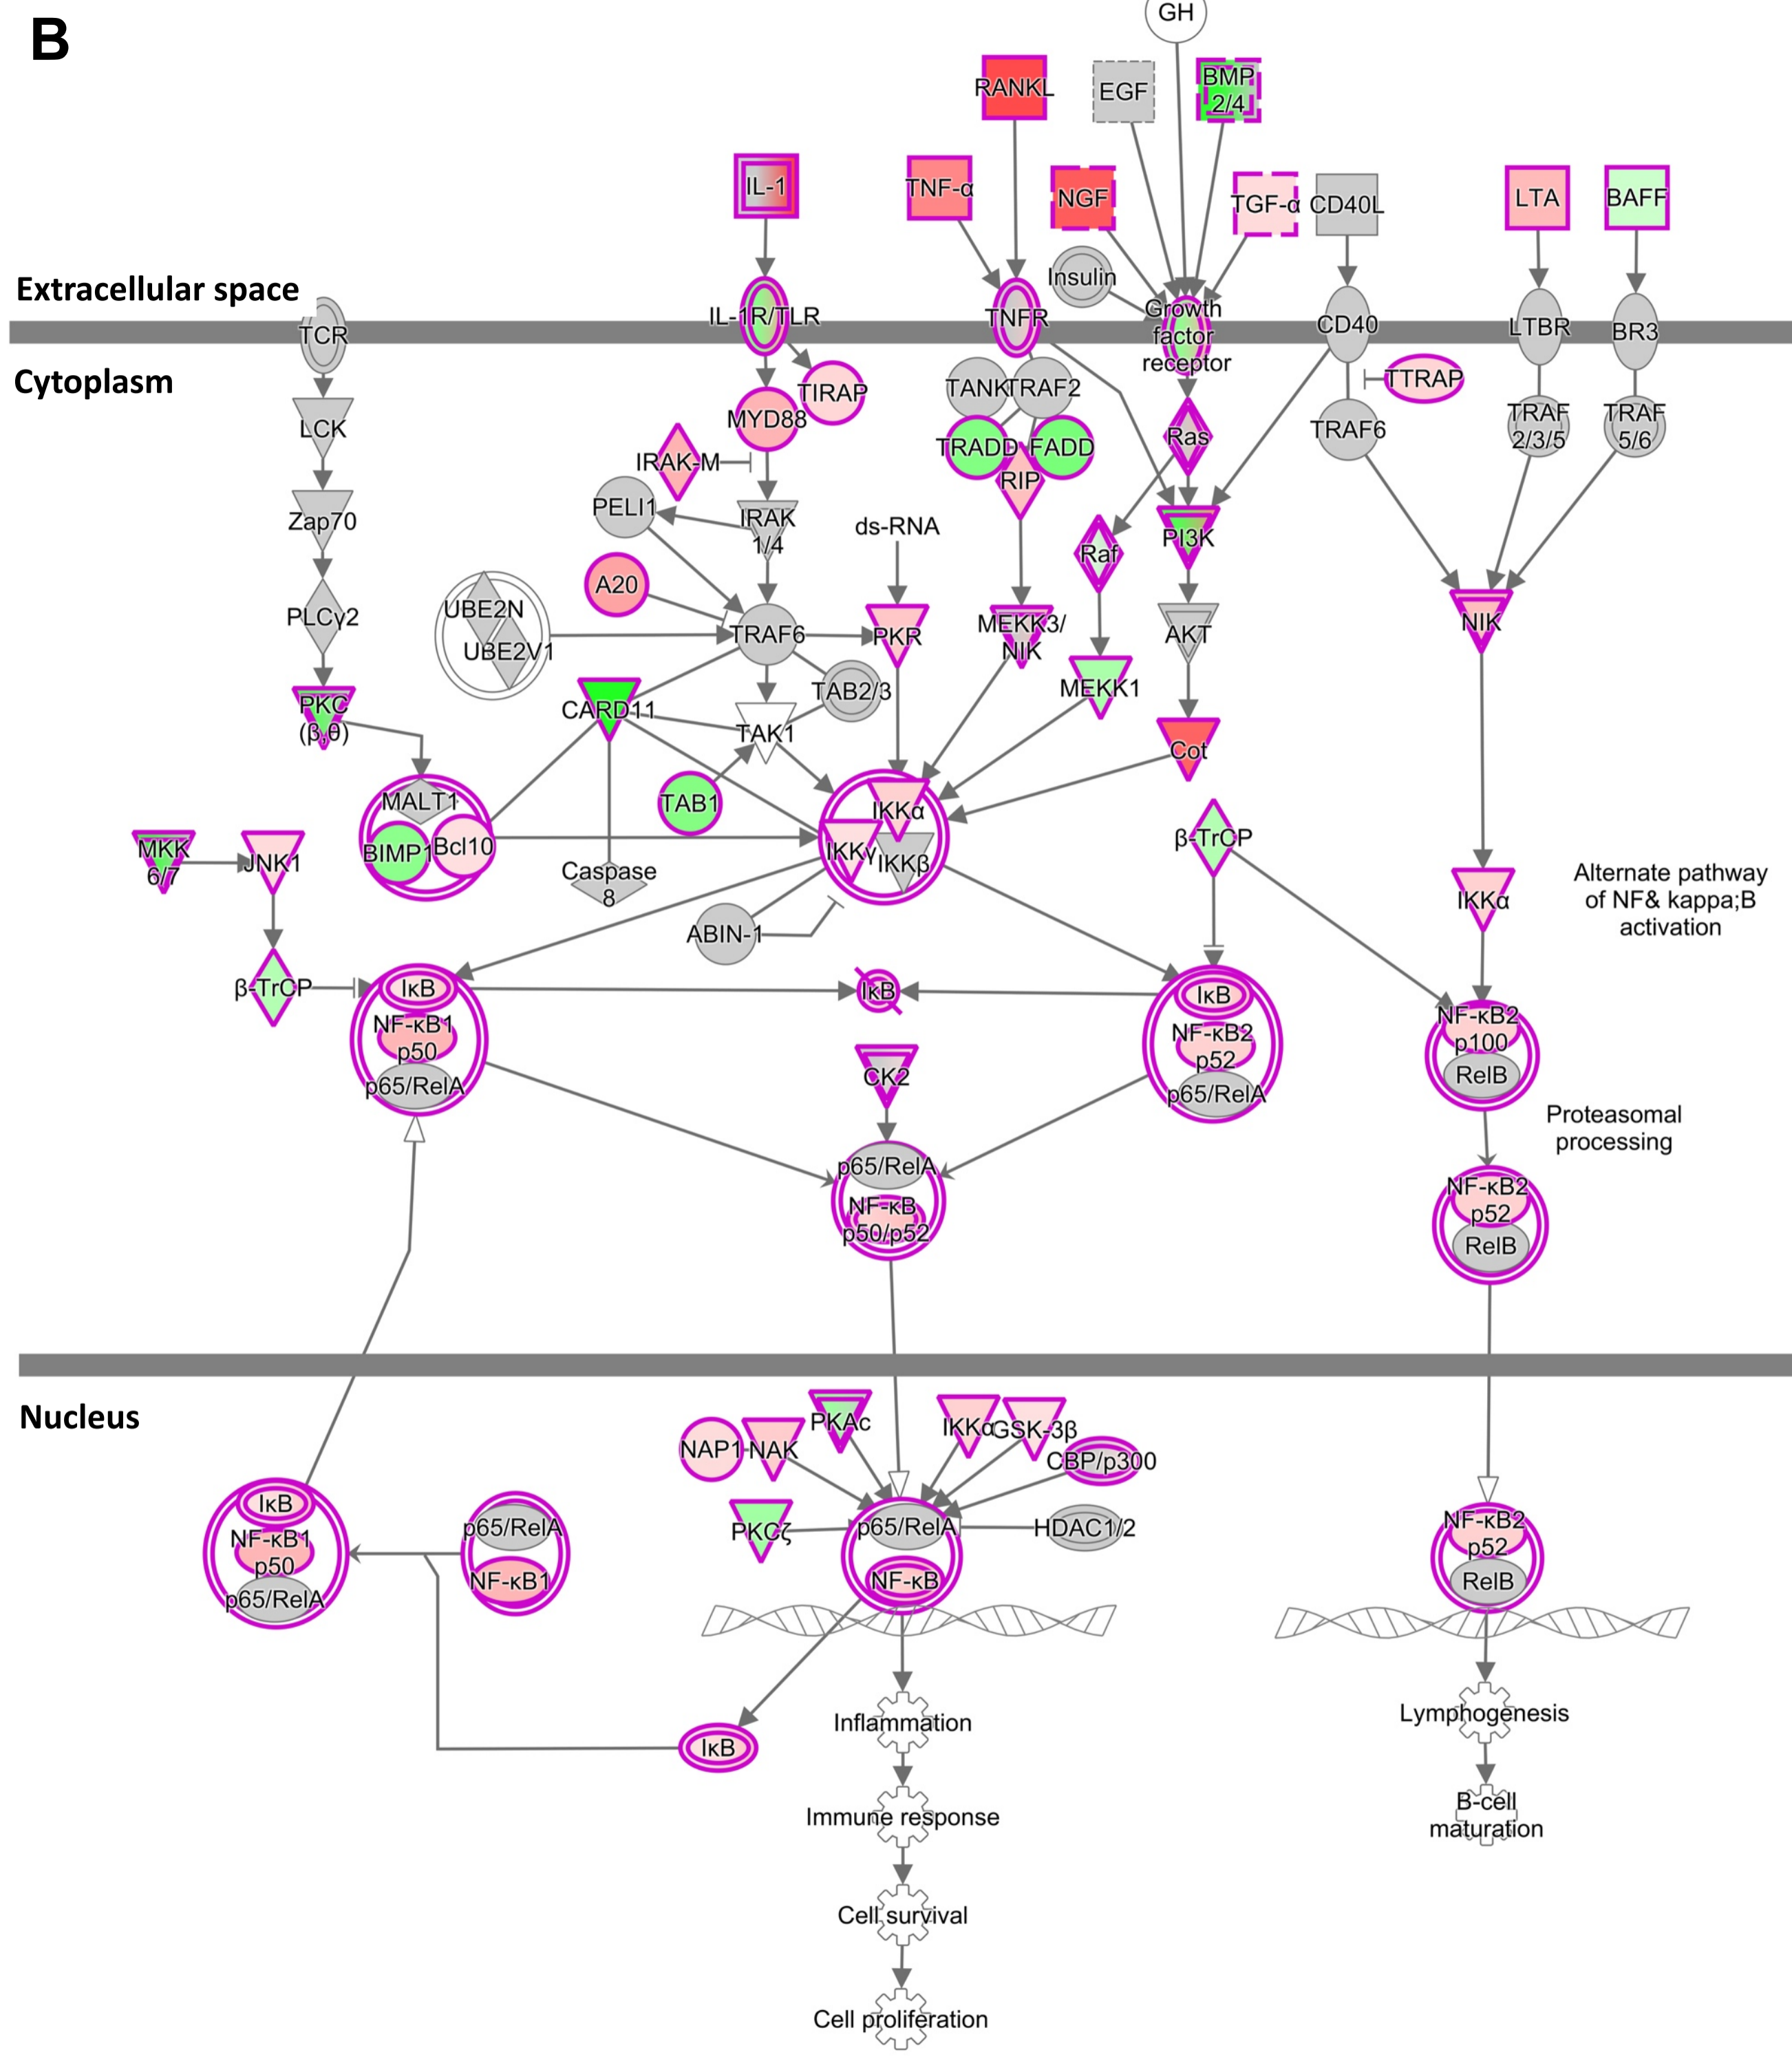



# Supplementary Fig. S3. Pg 1. Role of IL-17F in Allergic Airway Diseases

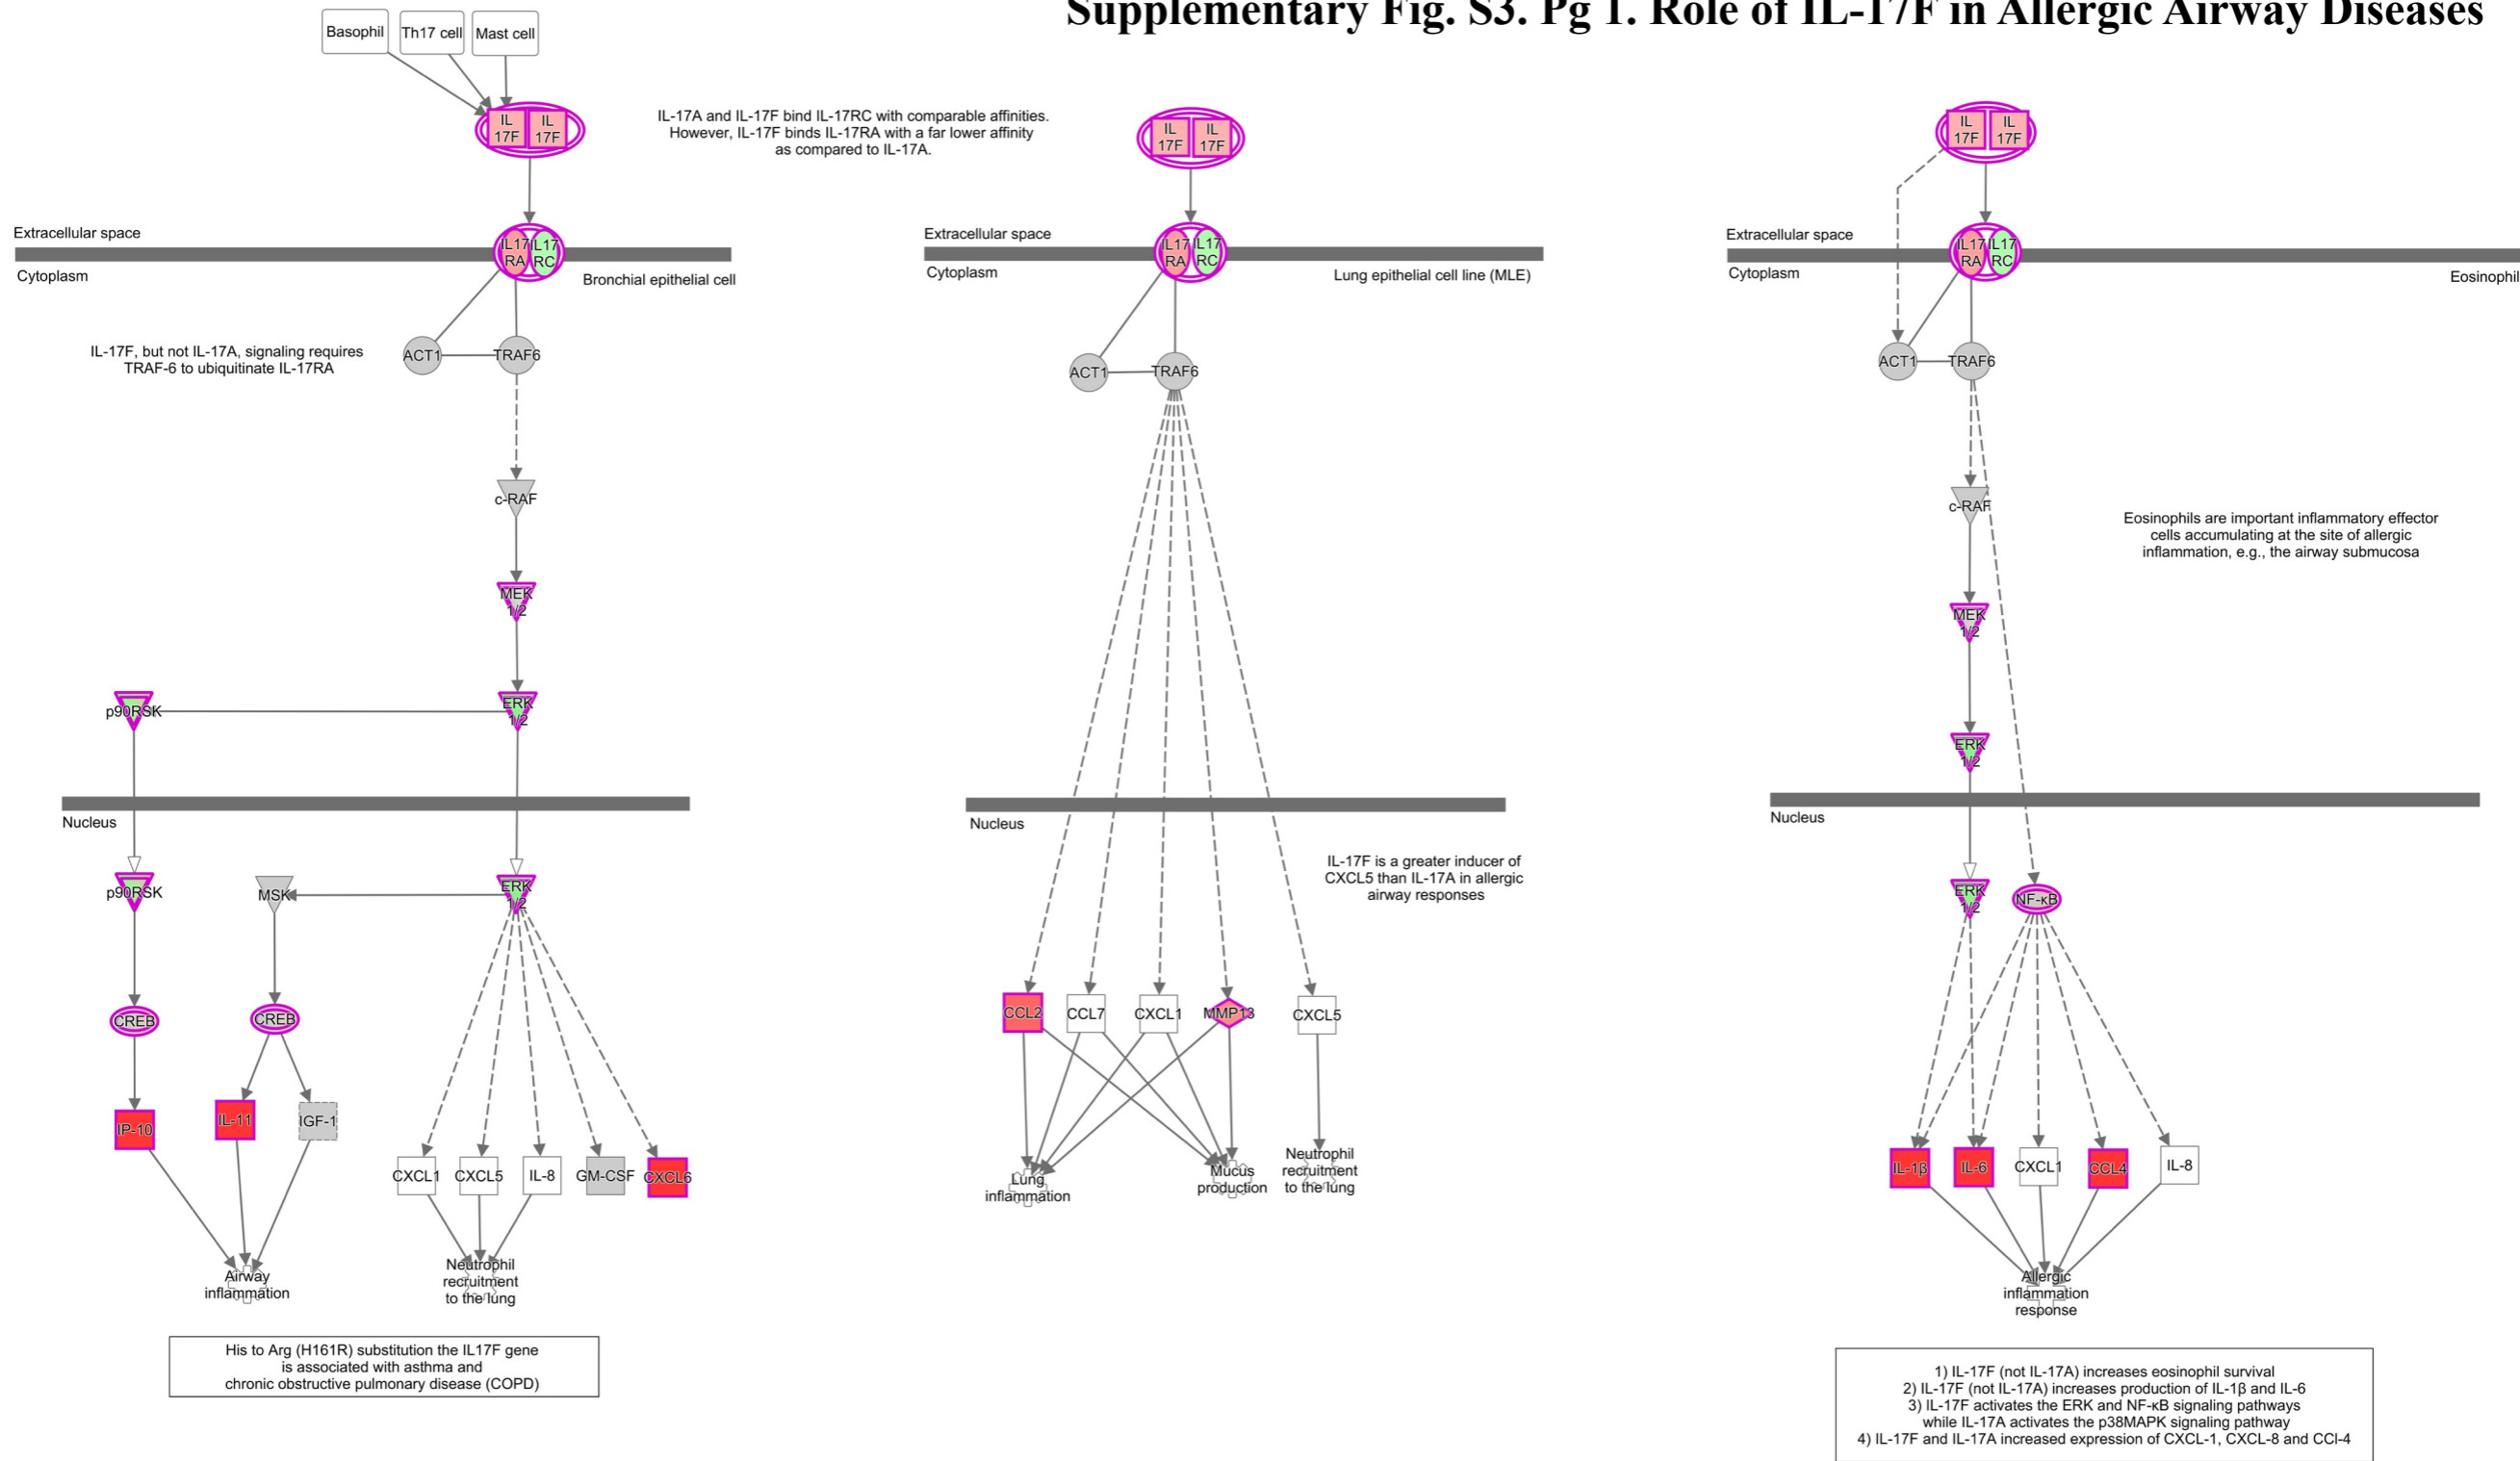

**Supplementary Fig. S3. Other upregulated pro-inflammatory pathways during ifosfamide induced hemorrhagic cystitis.** Other major upregulated proinflammatory pathways associated with ifosfamide induced hemorrhagic cystitis were **Role of IL-17F in Allergic Airway Diseases**, p38 MAPK signaling, Leucocyte Extravasation signaling, HMGB1 signaling, TREM1 signaling. Pathways, Functional and Network analyses were generated using IPA<sup>57</sup>. For the key to the annotations, see description in Supplementary Fig. S2 legend.

## Supplementary Fig. S3. Pg 2. p38 MAPK signaling

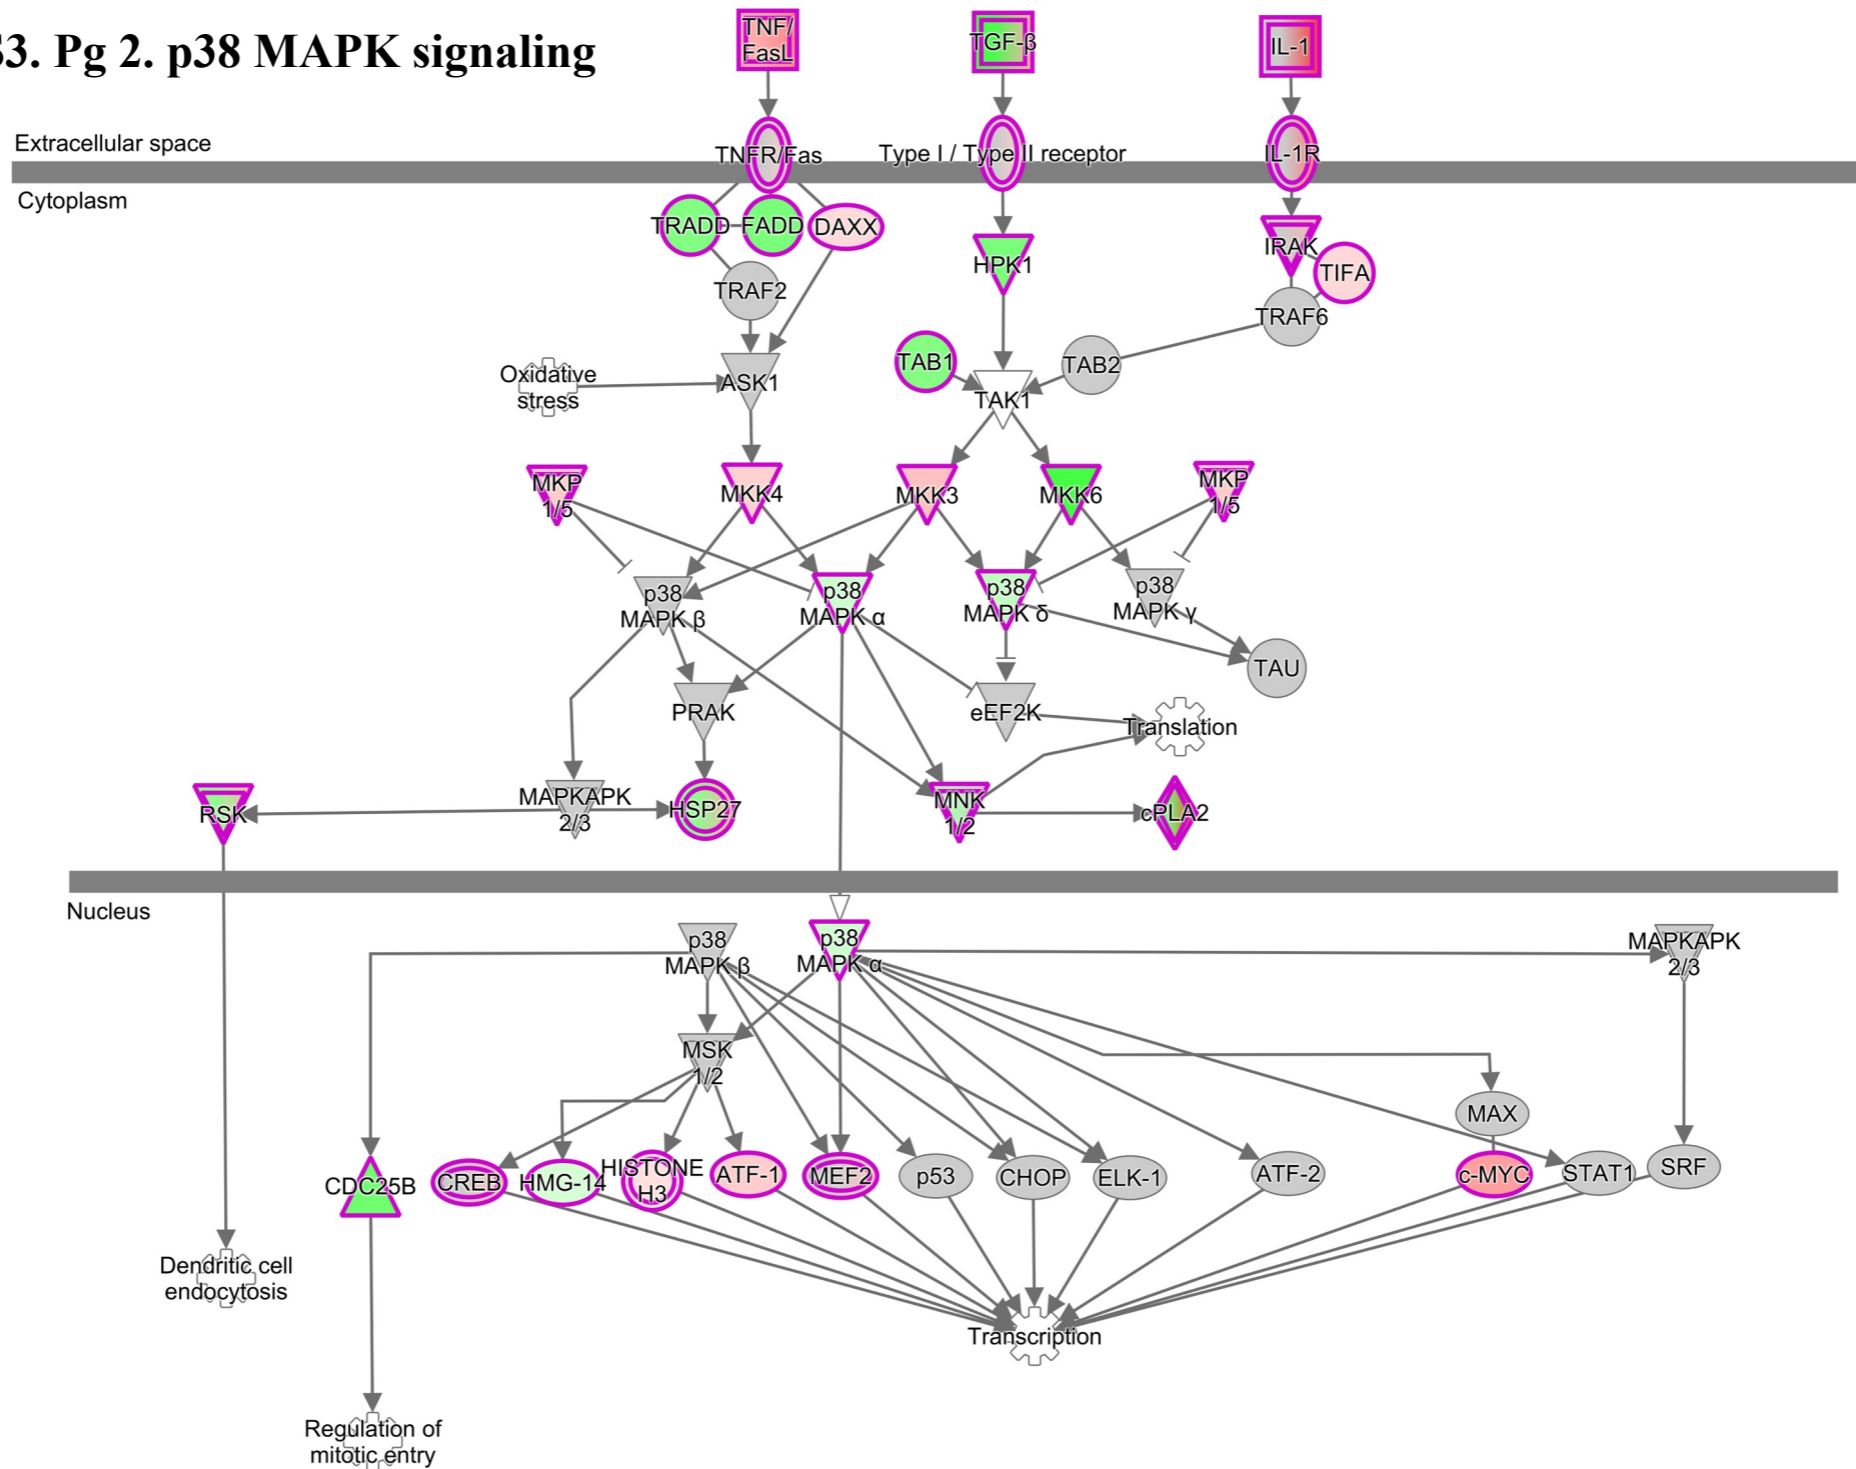

© 2000-2018 QIAGEN. All rights reserved.

**Supplementary Fig. S3. Other upregulated pro-inflammatory pathways during ifosfamide induced hemorrhagic cystitis.** Other major upregulated proinflammatory pathways associated with ifosfamide induced hemorrhagic cystitis were Role of IL-17F in Allergic Airway Diseases, **p38 MAPK signaling**, Leucocyte Extravasation signaling, HMGB1 signaling, TREM1 signaling. Pathways, Functional and Network analyses were generated using IPA<sup>57</sup>. For the key to the annotations, see description in Supplementary Fig. S2 legend.

### Supplementary Fig. S3. Pg 3. Leucocyte Extravasation signaling

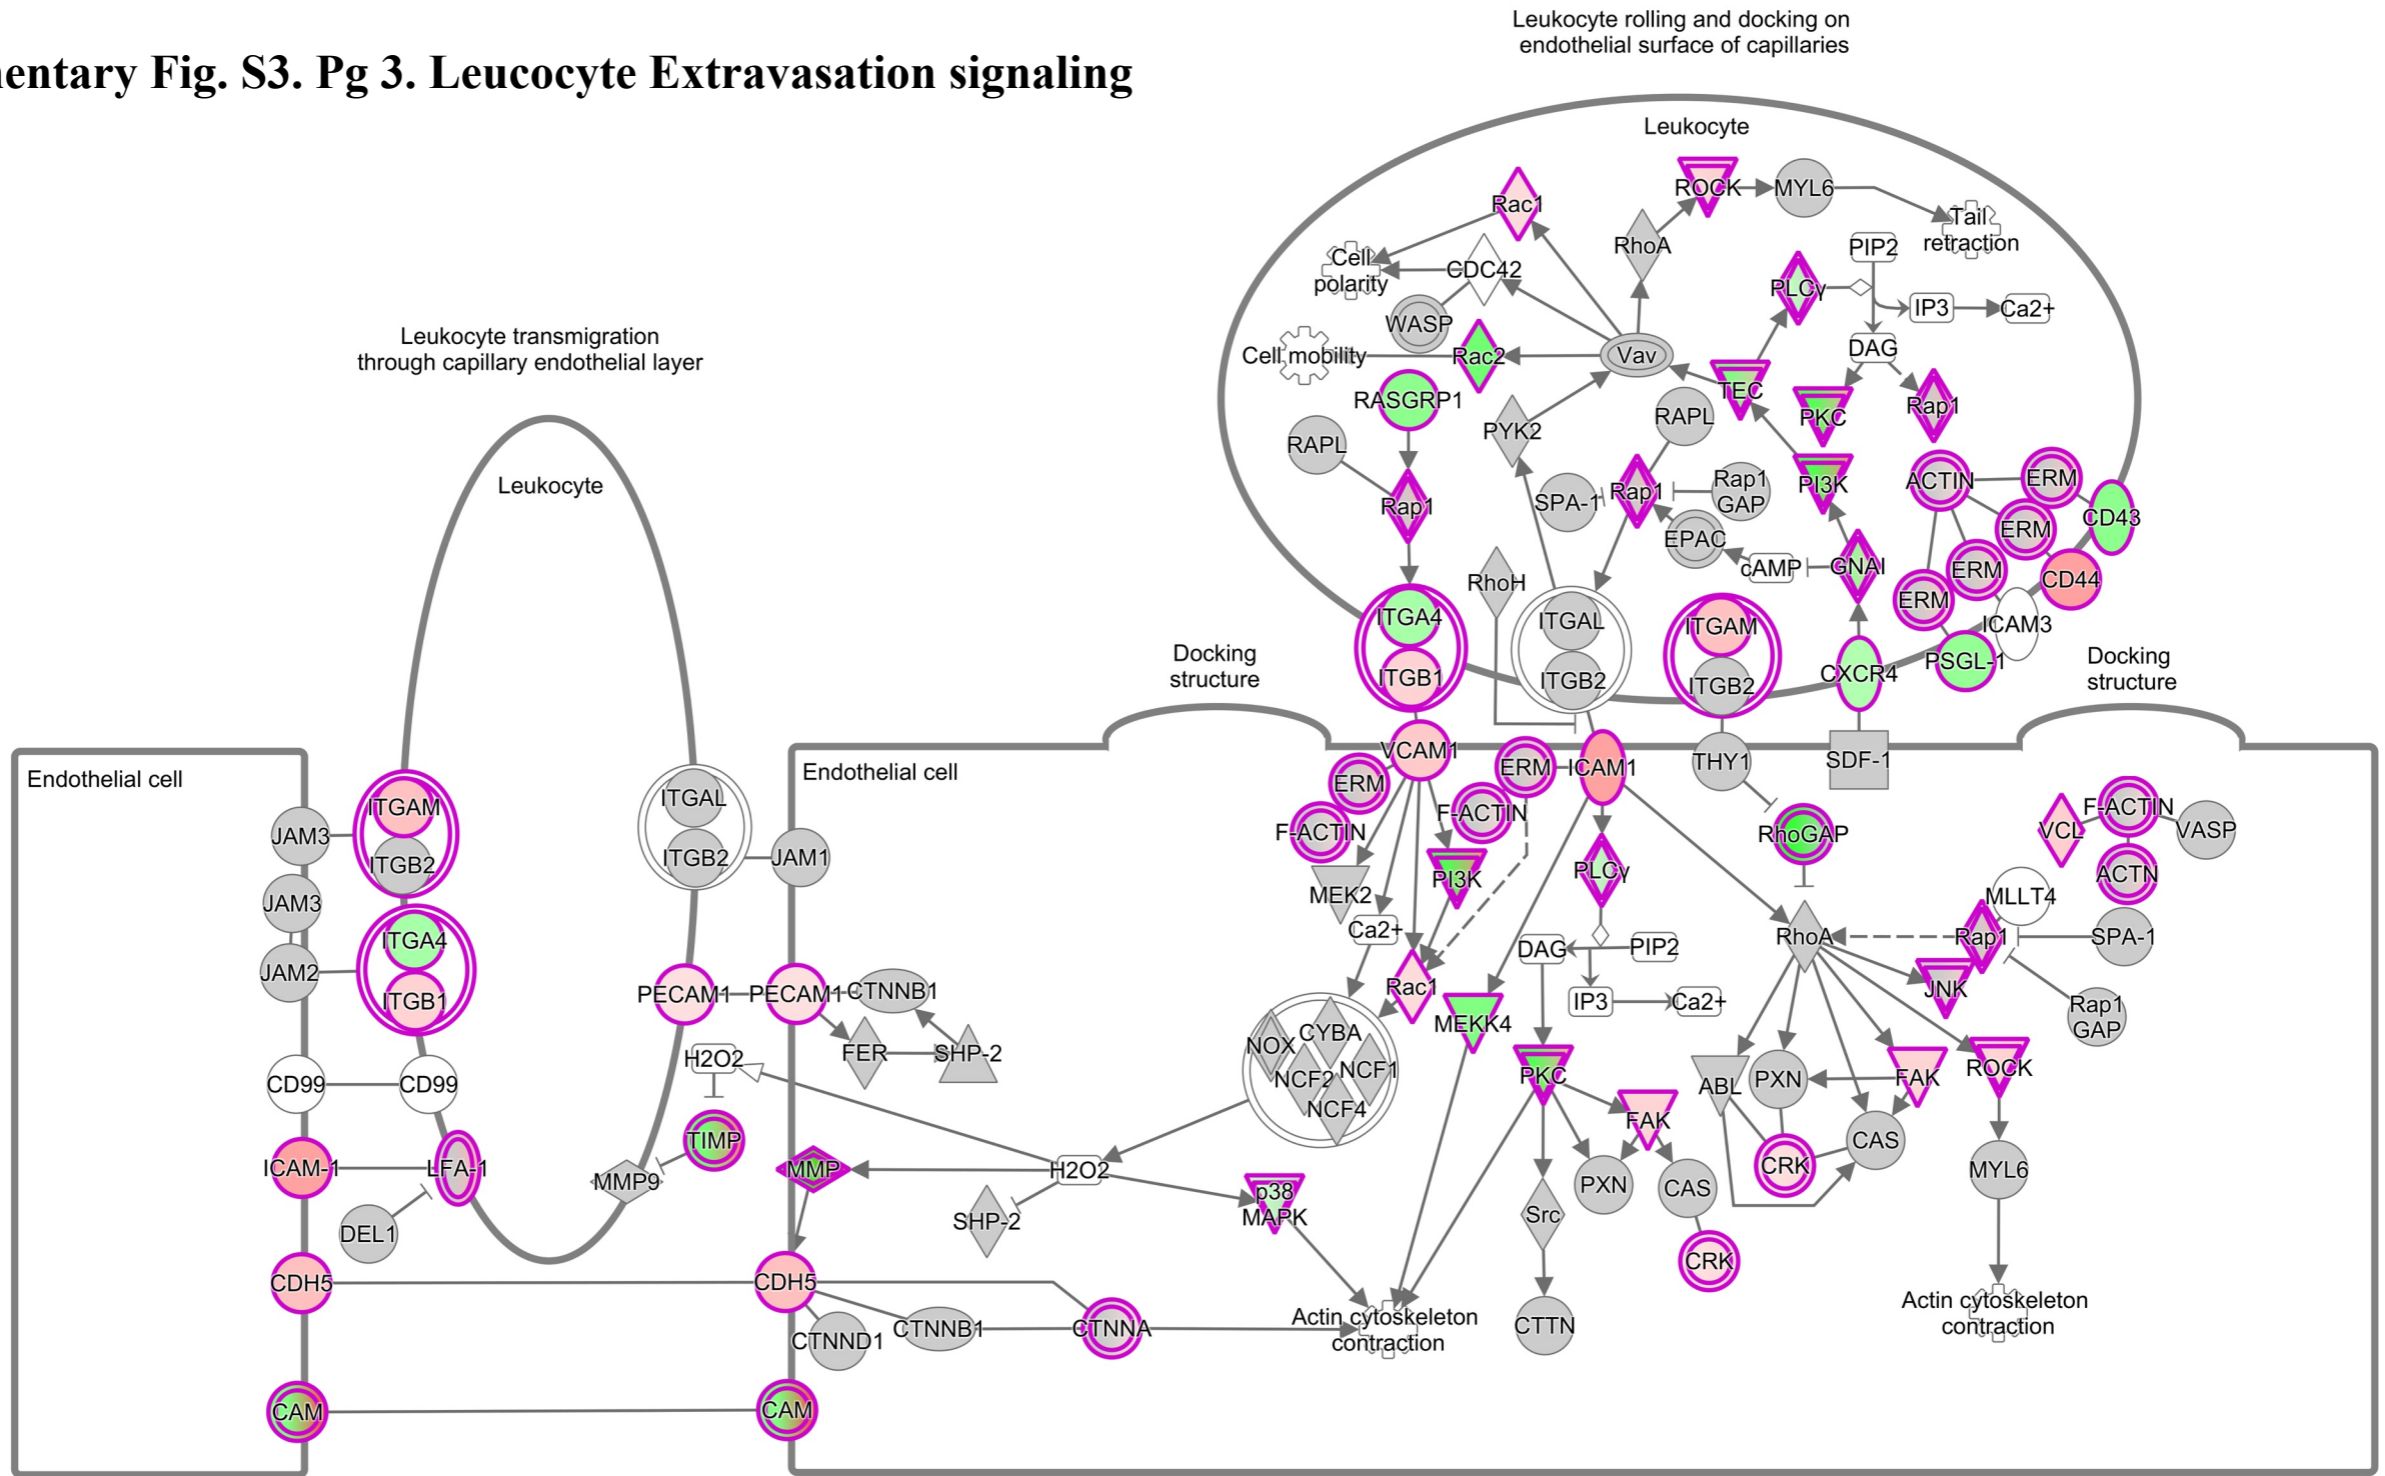

© 2000-2018 QIAGEN. All rights reserved.

**Supplementary Fig. S3. Other upregulated pro-inflammatory pathways during ifosfamide induced hemorrhagic cystitis.** Other major upregulated proinflammatory pathways associated with ifosfamide induced hemorrhagic cystitis were Role of IL-17F in Allergic Airway Diseases, p38 MAPK signaling, **Leucocyte Extravasation signaling**, HMGB1 signaling, TREM1 signaling. Pathways, Functional and Network analyses were generated using IPA<sup>57</sup>. For the key to the annotations, see description in Supplementary Fig. S2 legend.

## Supplementary Fig. S3. Pg 4. HMGB1 signaling

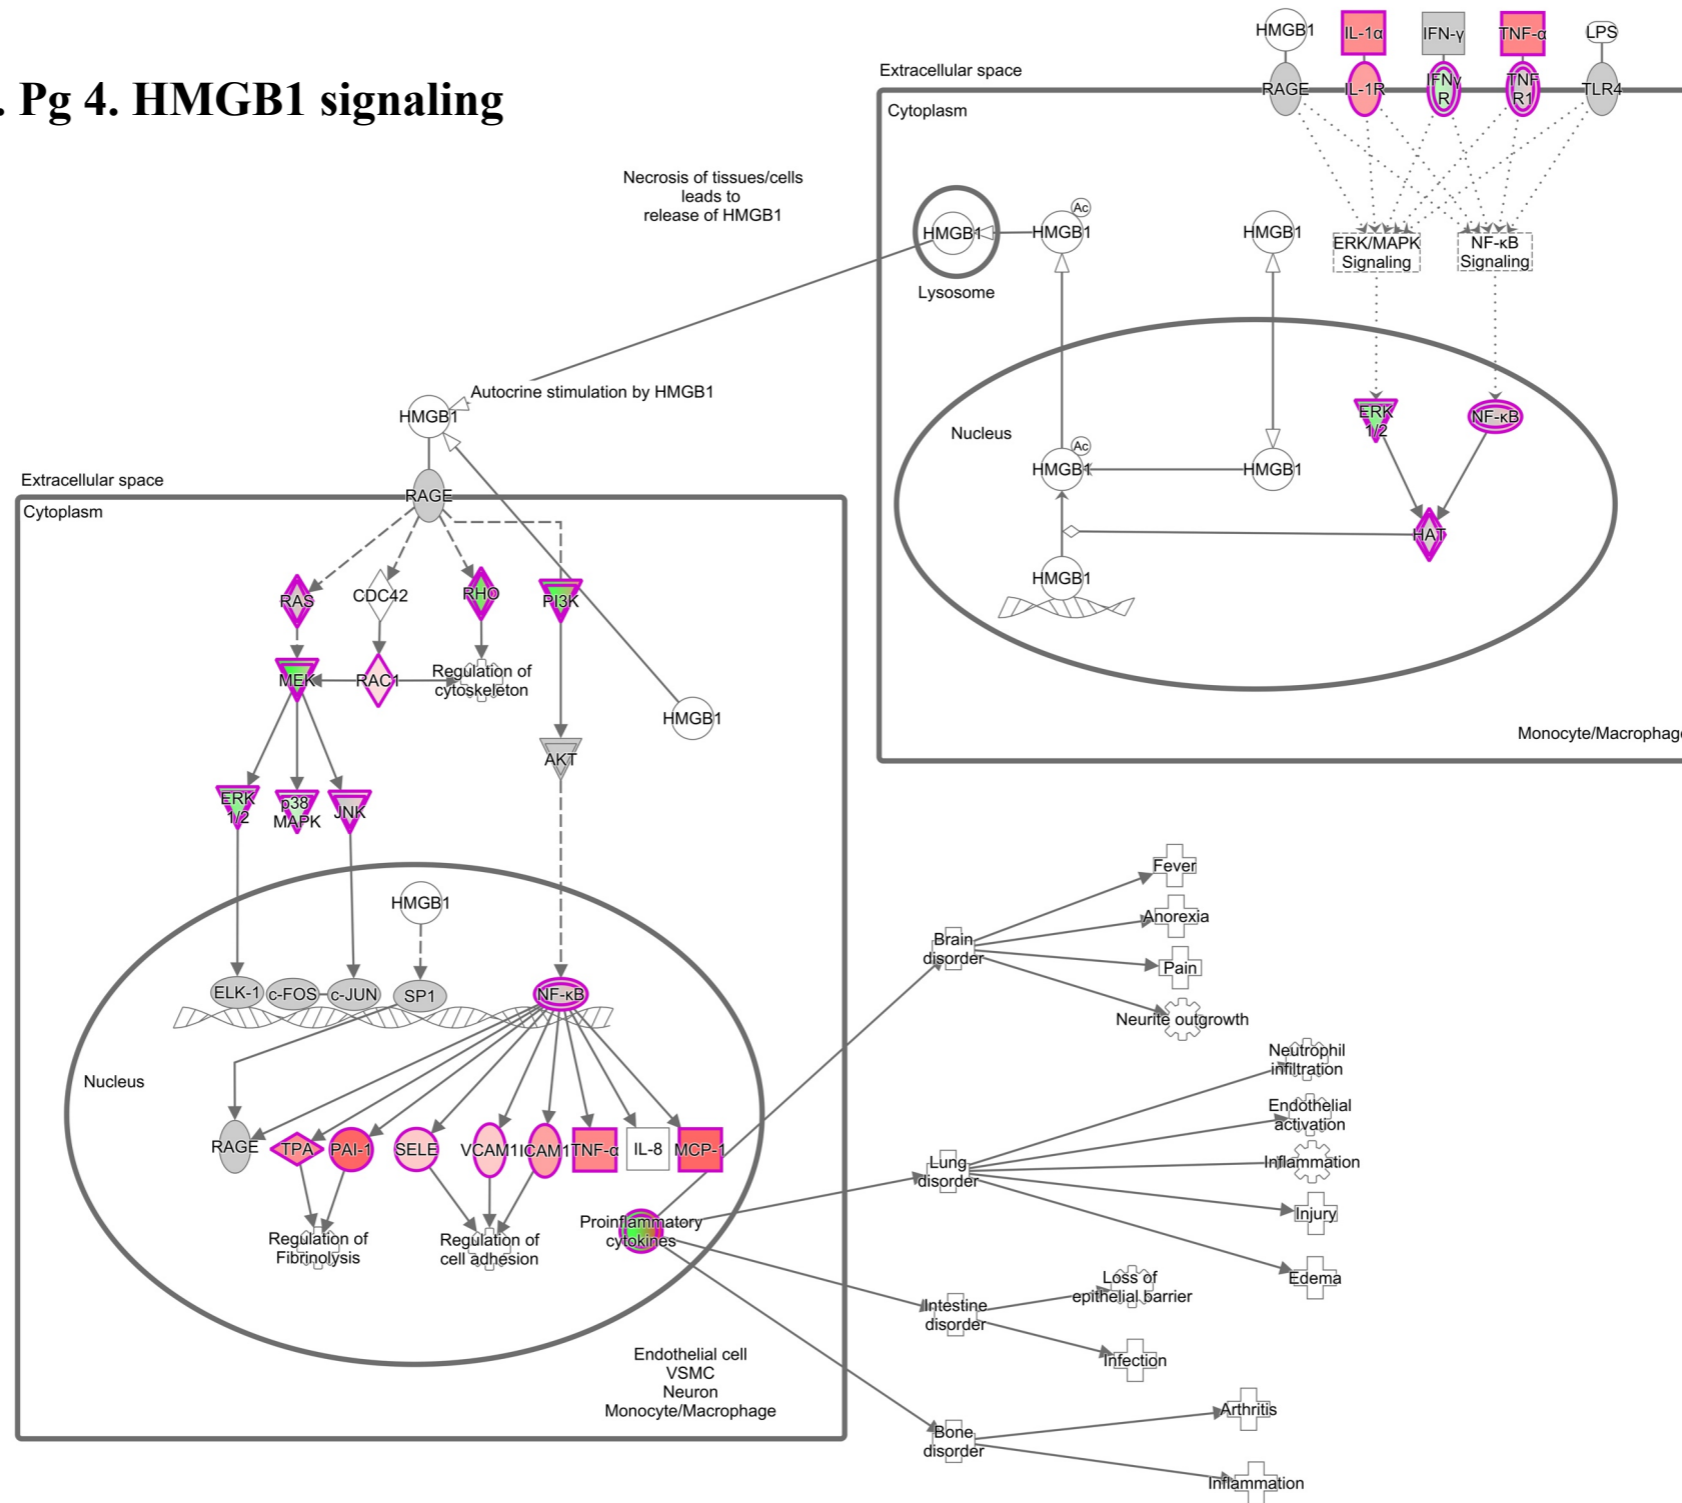

© 2000-2018 QIAGEN. All rights reserved.

**Supplementary Fig. S3. Other upregulated pro-inflammatory pathways during ifosfamide induced hemorrhagic cystitis.** Other major upregulated proinflammatory pathways associated with ifosfamide induced hemorrhagic cystitis were Role of IL-17F in Allergic Airway Diseases, p38 MAPK signaling, Leucocyte Extravasation signaling, **HMGB1 signaling**, TREM1 signaling. Pathways, Functional and Network analyses were generated using IPA<sup>57</sup>. For the key to the annotations, see description in Supplementary Fig. S2 legend.

## Supplementary Fig. S3. Pg 5: TREM1 signaling.

TREM1 Signaling : Galaxy346-[fos\_vs\_Sat\_DESeq2\_result\_file\_on\_data\_21\_data\_22\_and\_others] : Expr Log Ratio

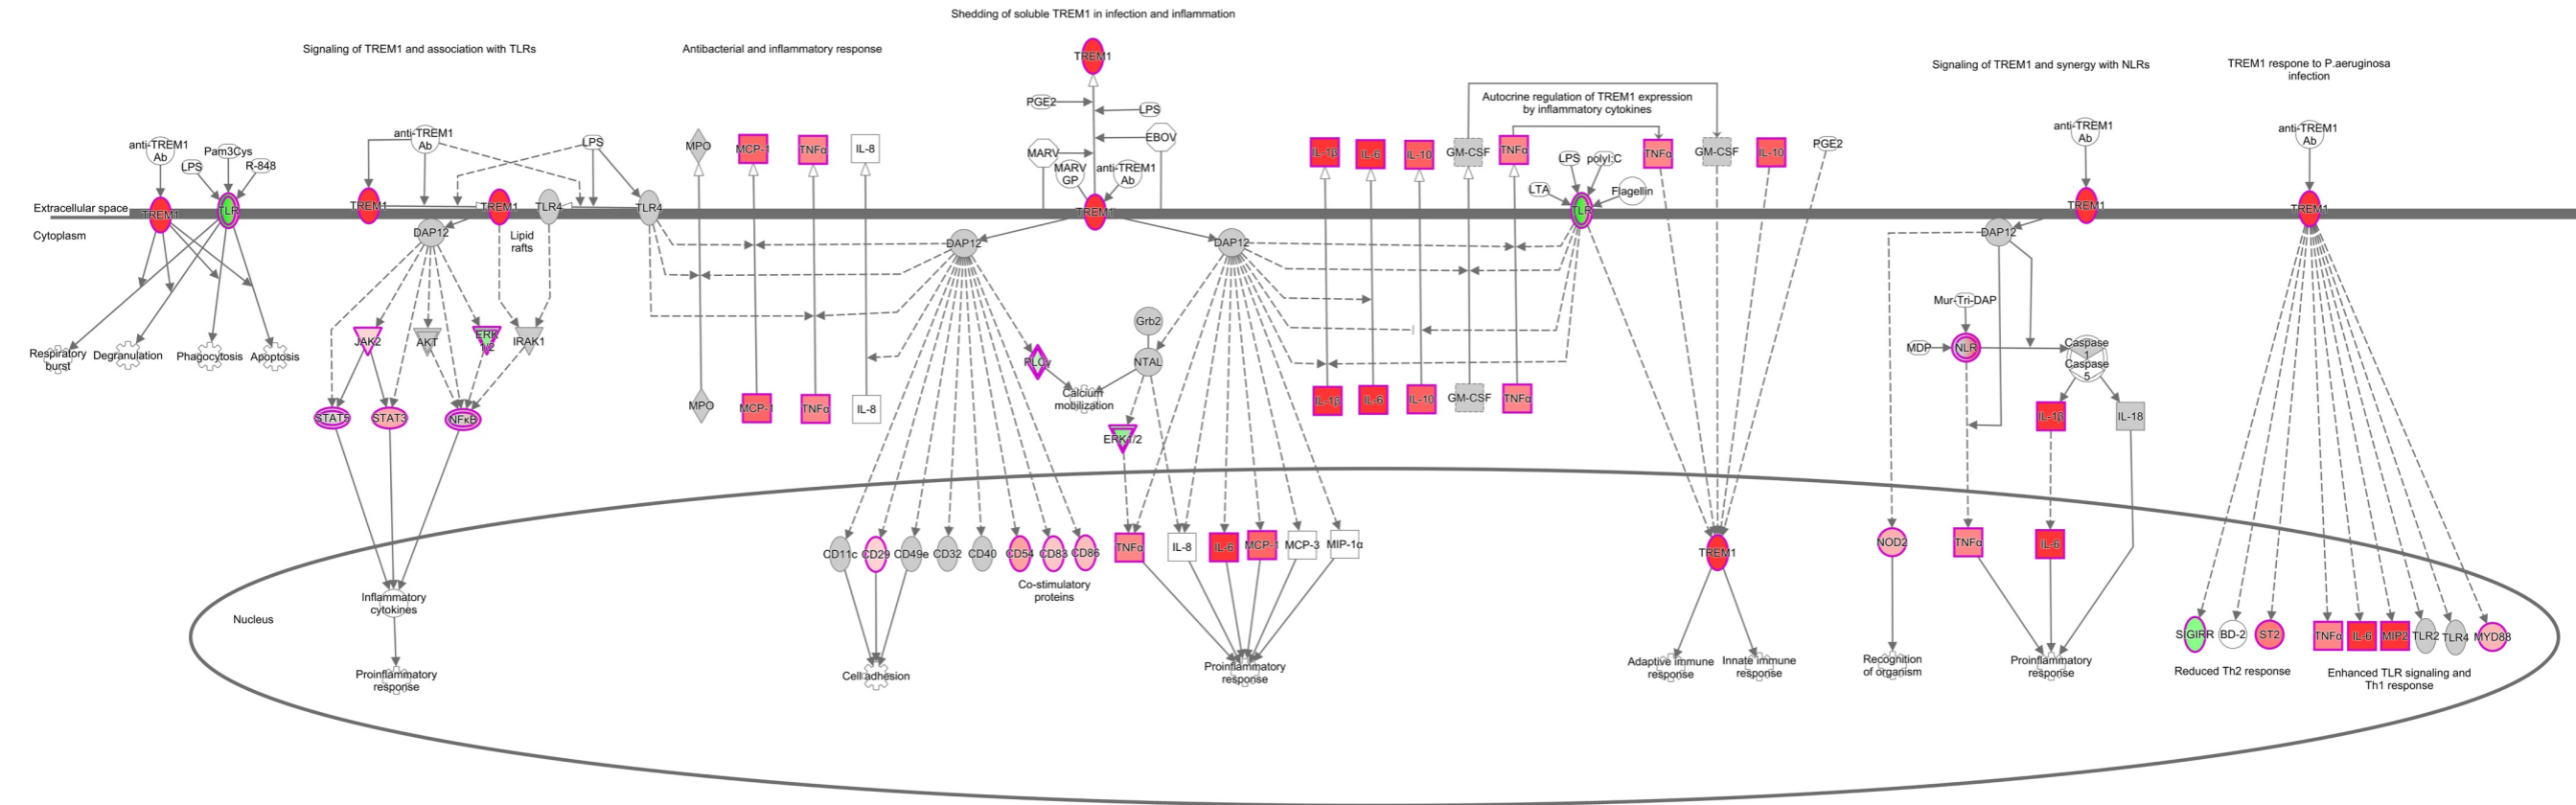

© 2000-2018 QIAGEN. All rights reserved.

**Supplementary Fig. S3. Other upregulated pro-inflammatory pathways during ifosfamide induced hemorrhagic cystitis.** Other major upregulated proinflammatory pathways associated with ifosfamide induced hemorrhagic cystitis were Role of IL-17F in Allergic Airway Diseases, p38 MAPK signaling, Leucocyte Extravasation signaling, HMGB1 signaling, **TREM1 signaling**. Pathways, Functional and Network analyses were generated using IPA<sup>57</sup>. For the key to the annotations, see description in Supplementary Fig. S2 legend.

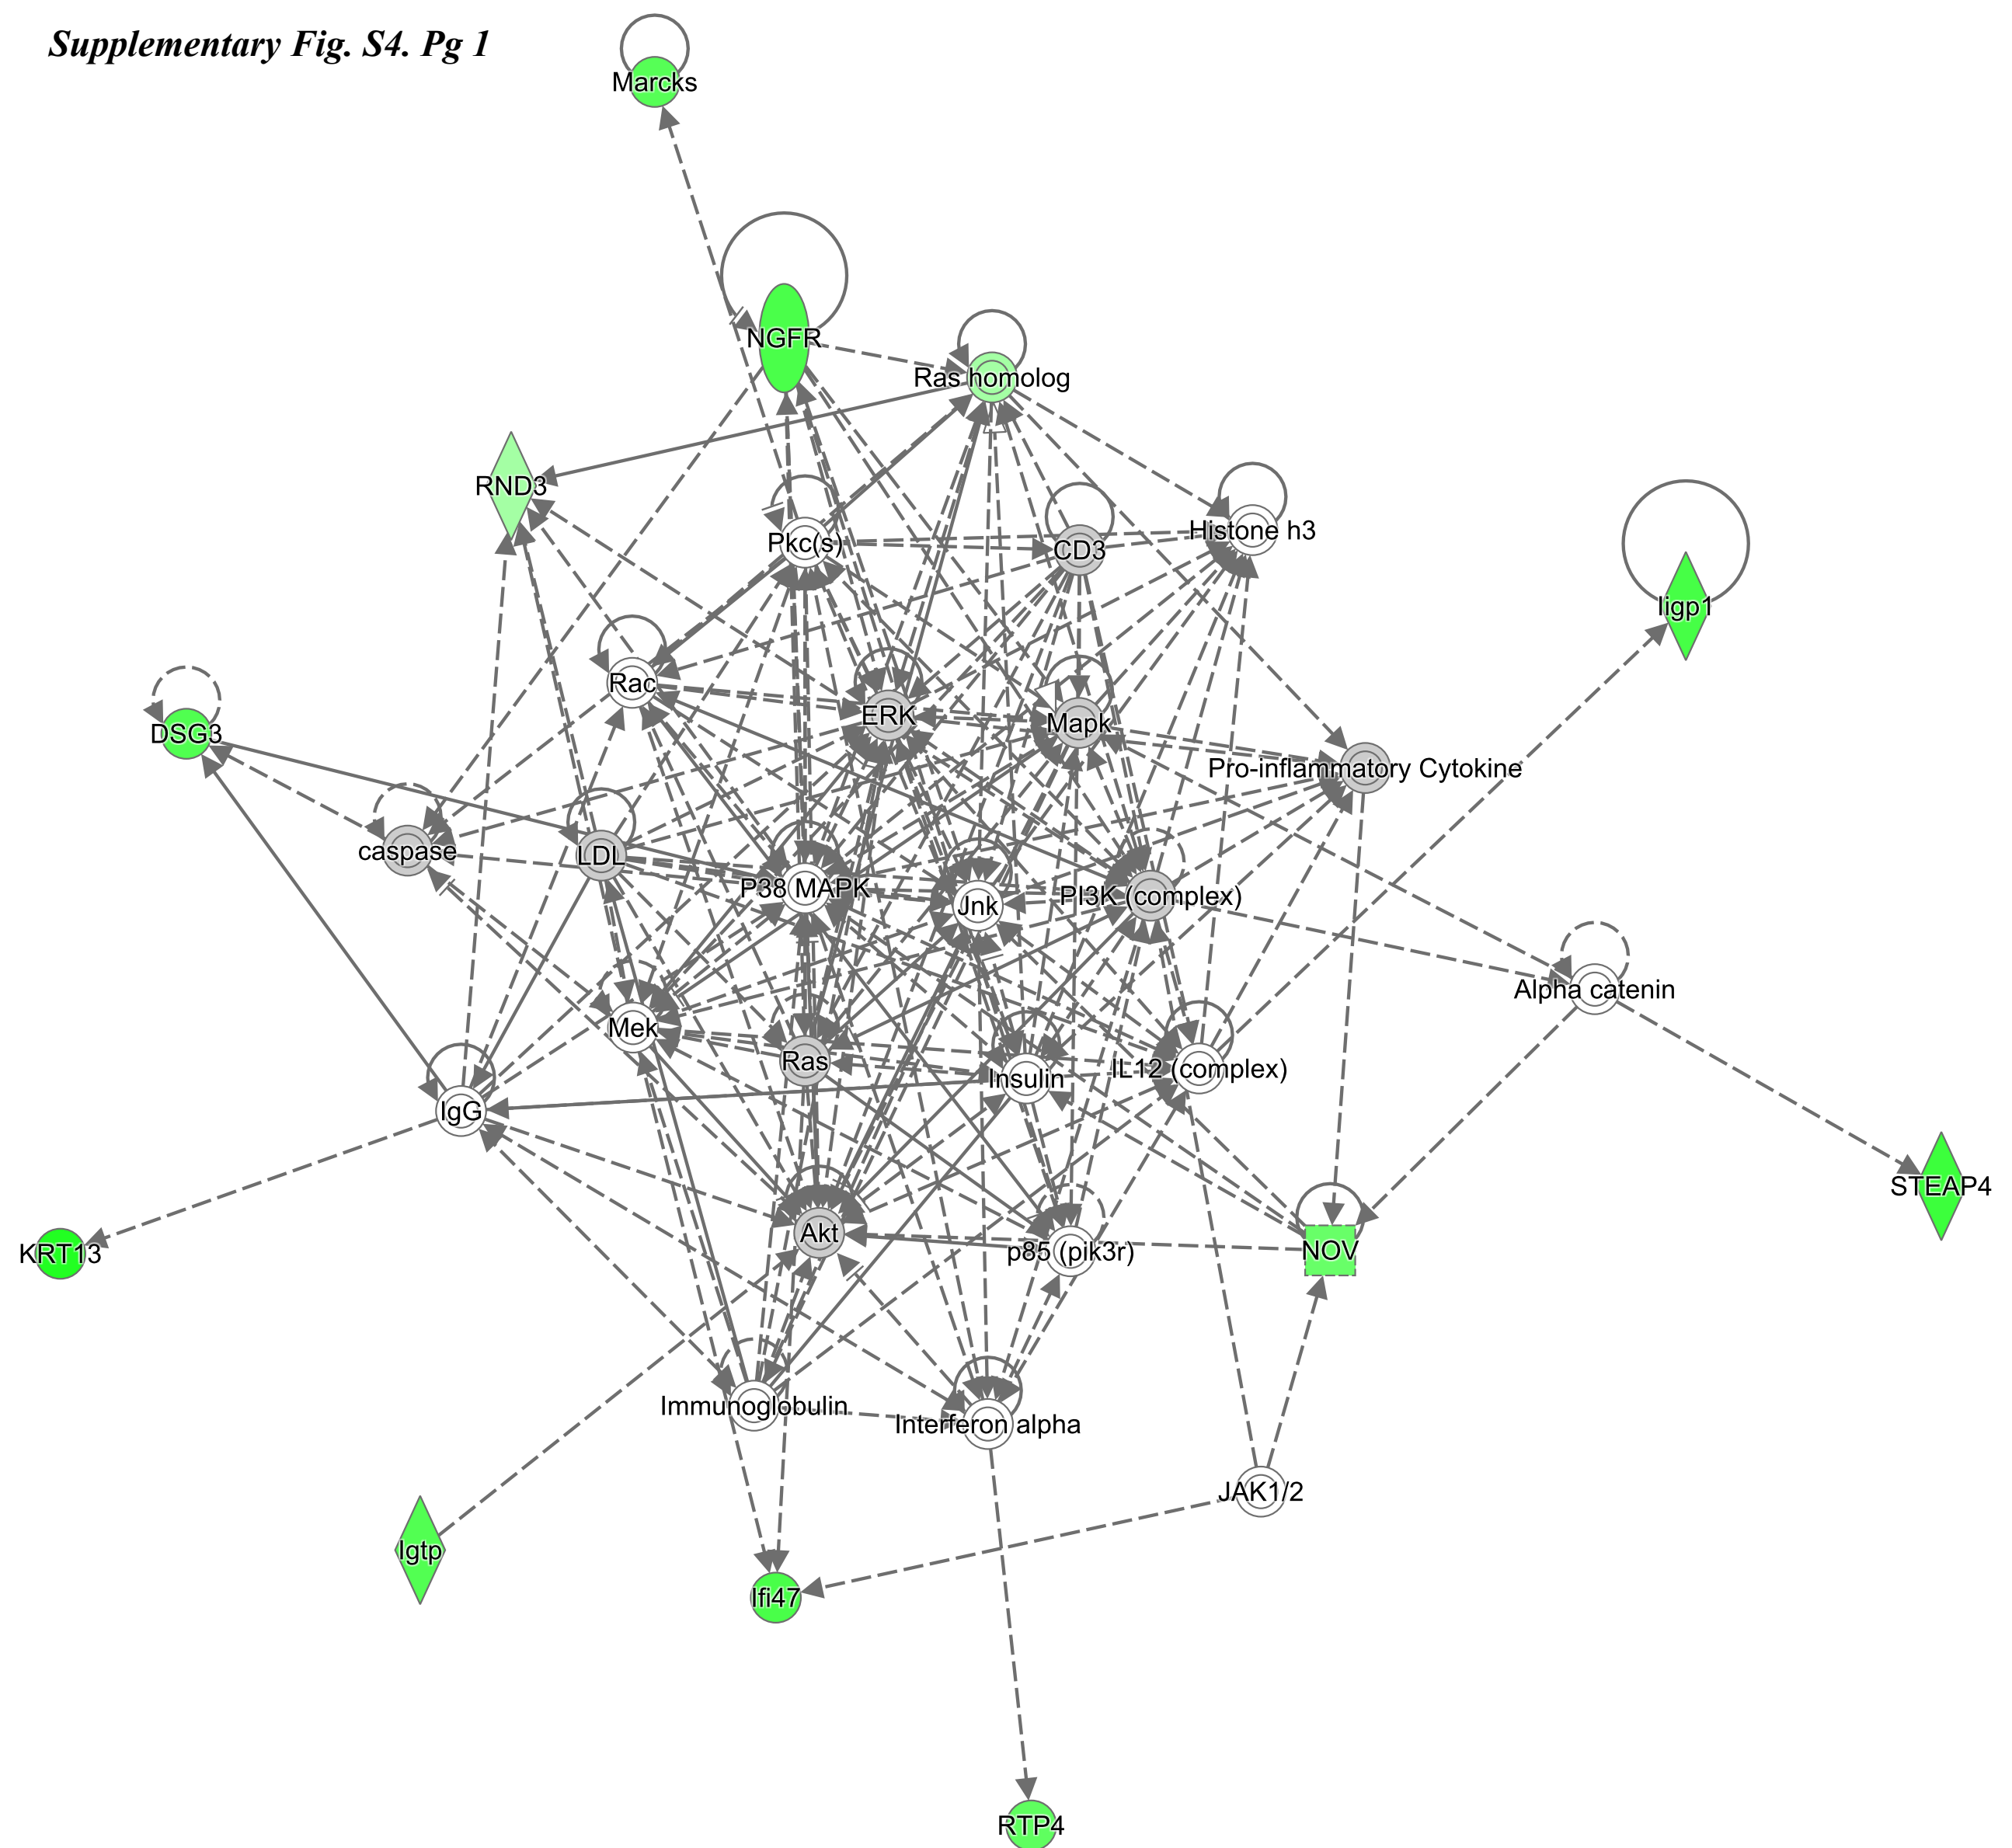

**Supplementary Fig. S4. Mechanistic network analysis.** Pathways, Functional and Network analyses were generated using IPA<sup>57</sup>. Mechanistic network analysis of transcriptome of IPSE pretreated mice compared to ifosfamide only mice showed downregulation of interactions between several proinflammatory genes. In addition to the network interaction between chemokines and interferon induced proteins, we also recorded more downregulatory mechanistic network interaction between genes encoding interferons induced proteins. Orange color signifies directional gene expression that is part of dataset, passed the cut off values and upregulated. Green color signifies directional gene expression that is part of dataset, passed the cut off values and downregulated. Gray color signifies gene expression that is part of dataset but unchanged. White color signifies genes that is not part of dataset. For other keys to the shape annotations, see description in Supplementary Fig. S2 legend.

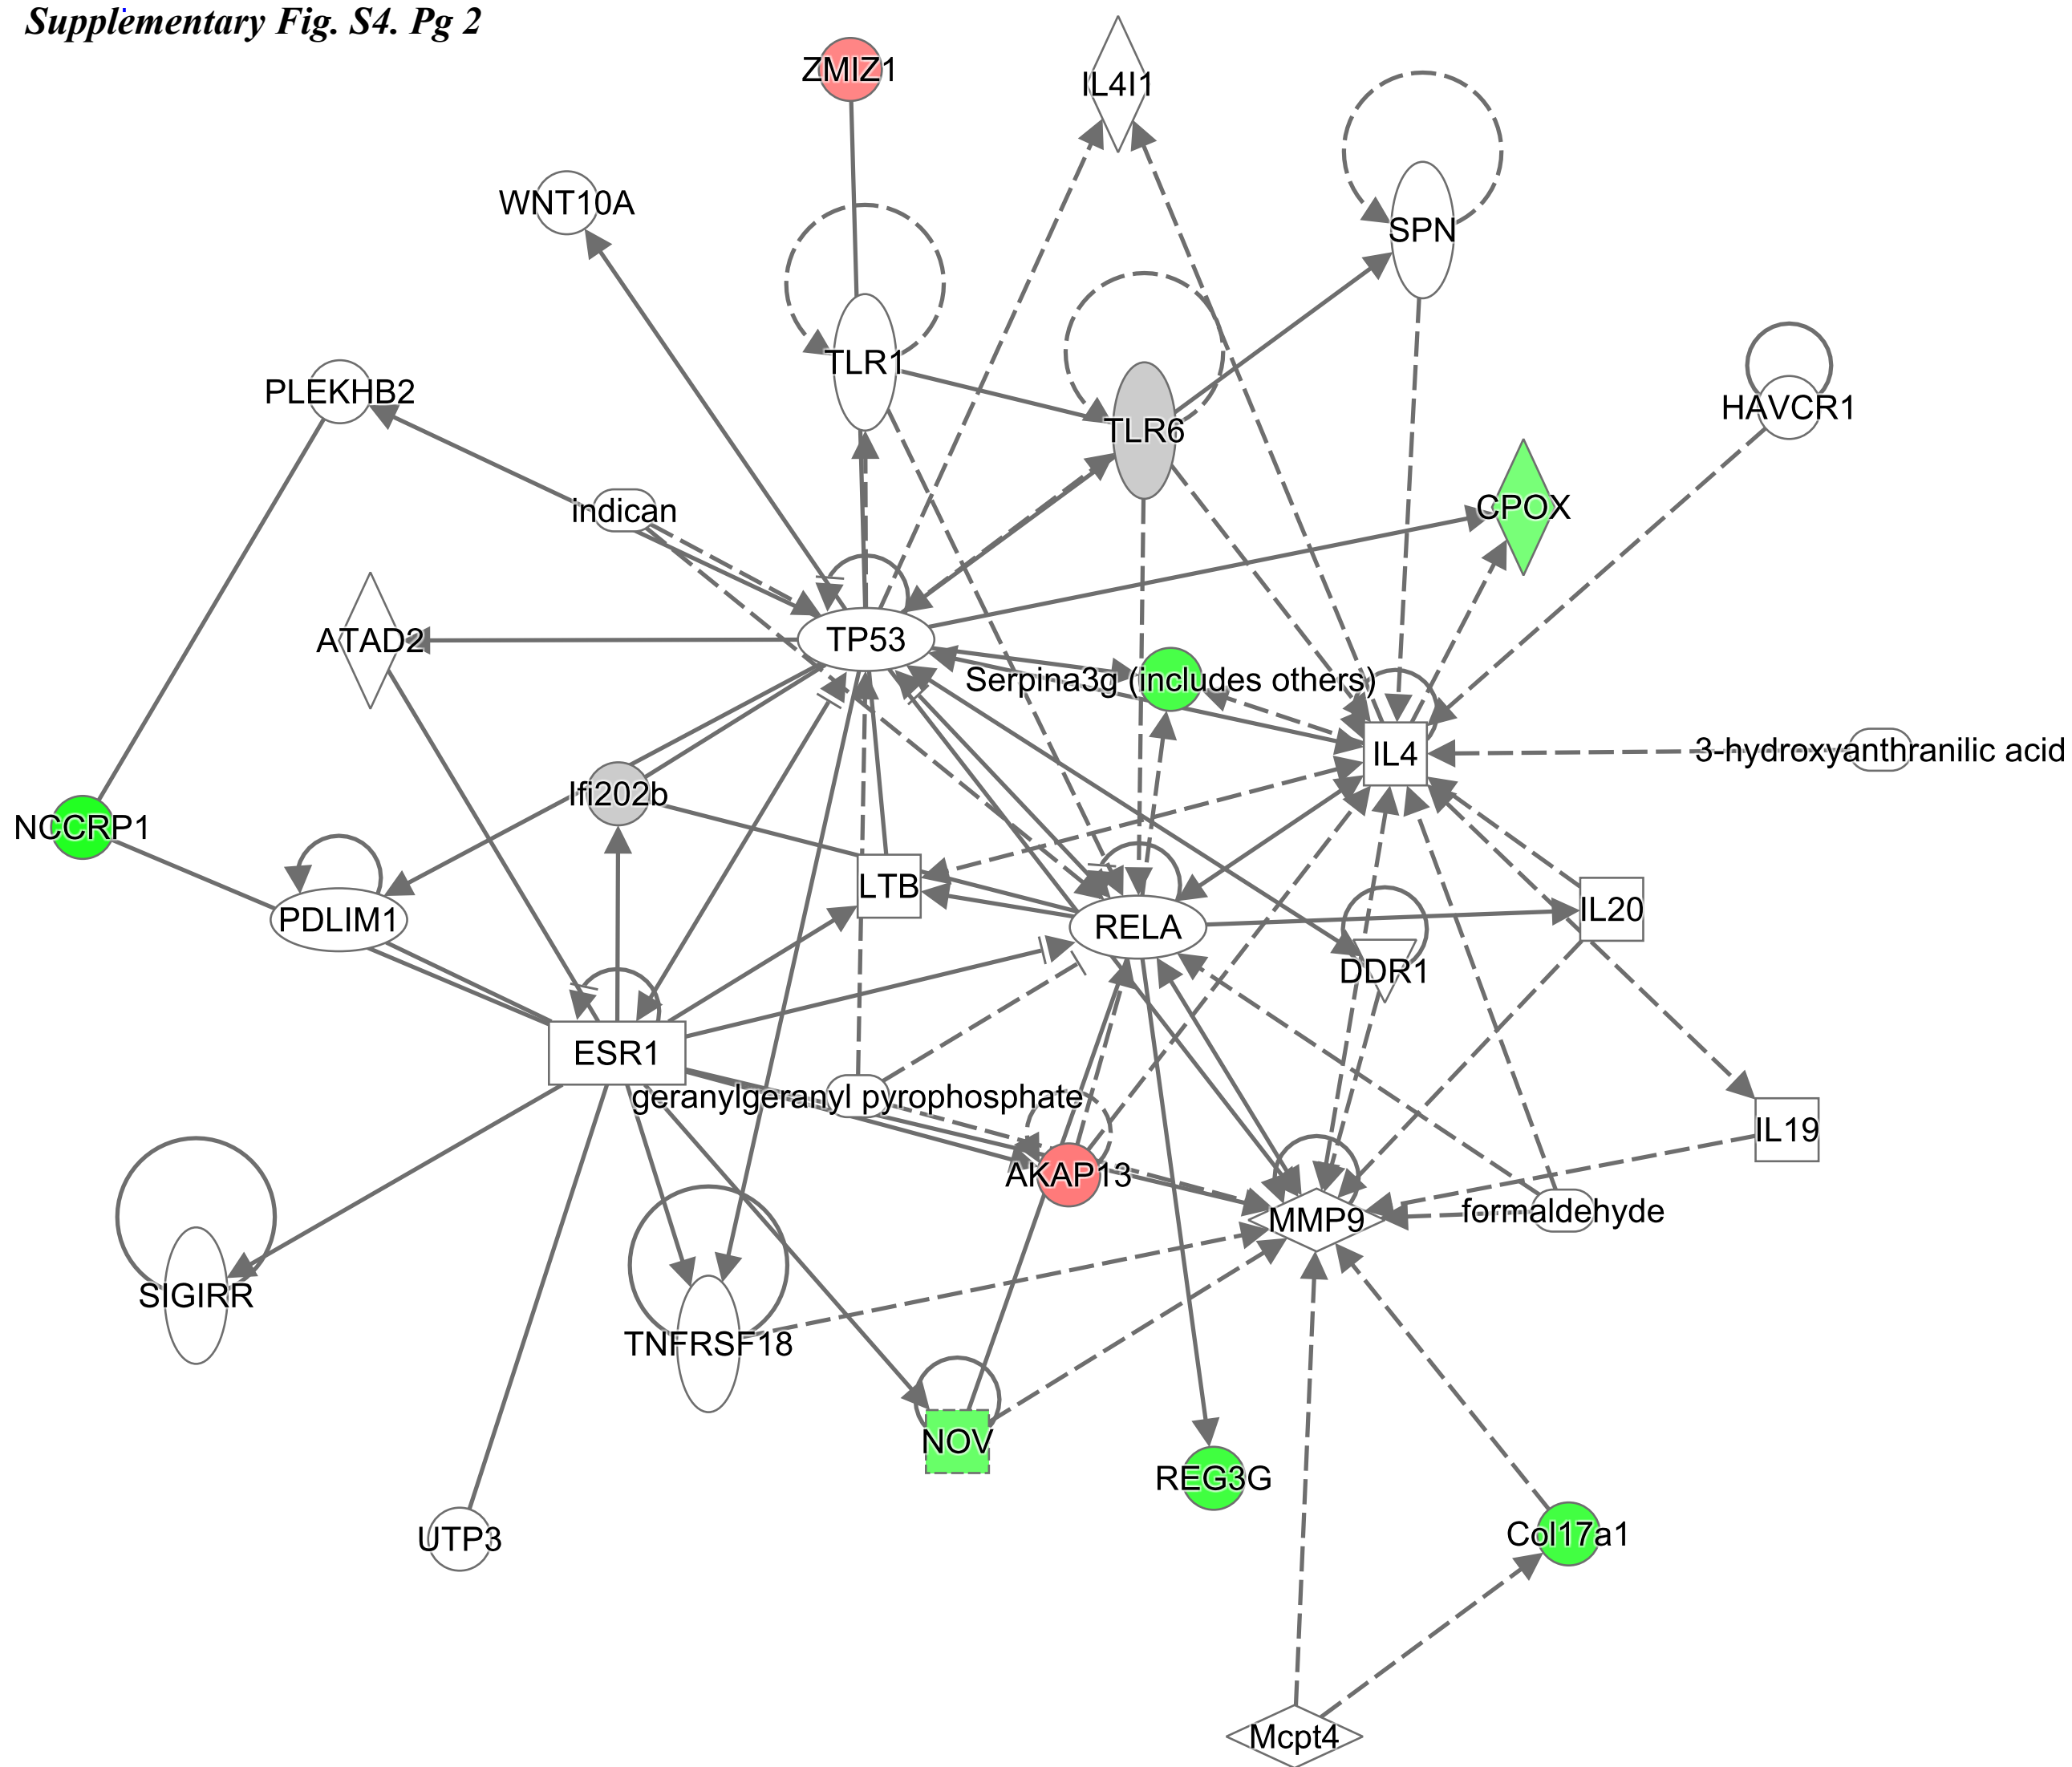

**Supplementary Fig. S4. Mechanistic network analysis.** Pathways, Functional and Network analyses were generated using IPA<sup>57</sup>. Mechanistic network analysis of transcriptome of IPSE pretreated mice compared to ifosfamide only mice showed downregulation of interactions between several proinflammatory genes. In addition to the network interaction between chemokines and interferon induced proteins, we also recorded more downregulatory mechanistic network interaction between genes encoding interferons induced proteins. Orange color signifies directional gene expression that is part of dataset, passed the cut off values and upregulated. Green color signifies directional gene expression that is part of dataset, passed the cut off values and downregulated. Gray color signifies gene expression that is part of dataset but unchanged. White color signifies genes that is not part of dataset. For other keys to the shape annotations, see description in Supplementary Fig. S2 legend.

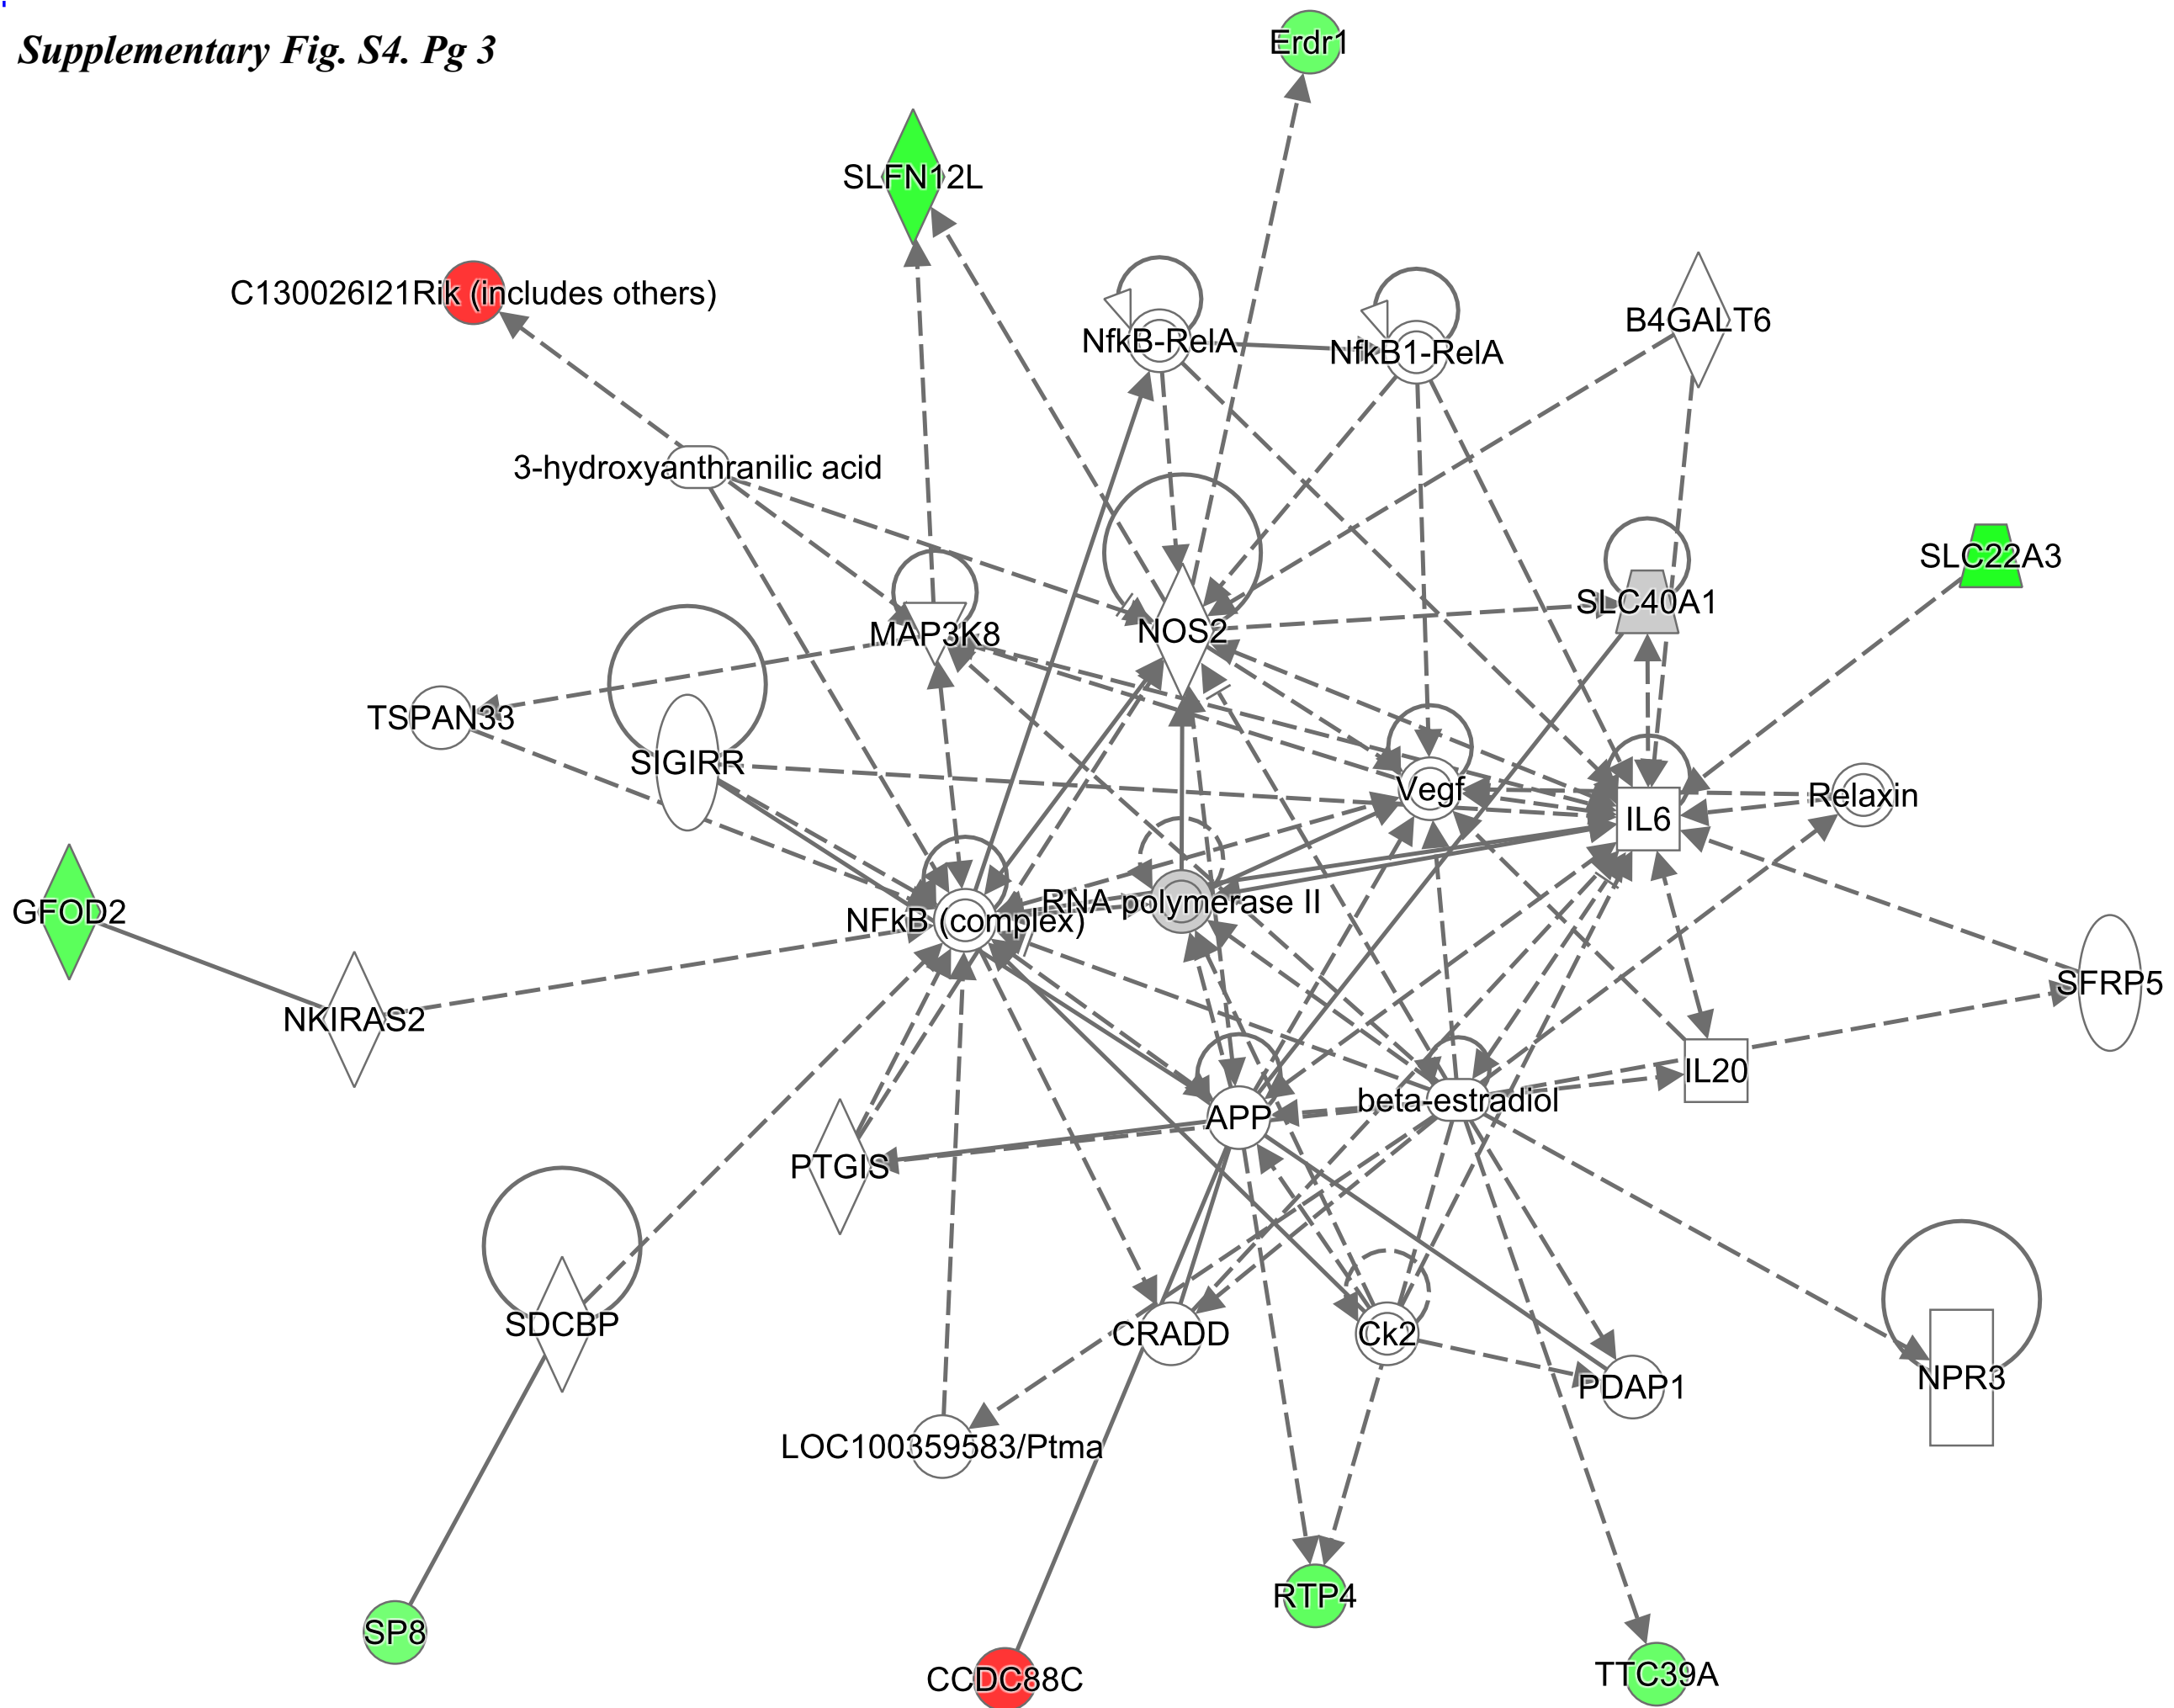

**Supplementary Fig. S4. Mechanistic network analysis.** Pathways, Functional and Network analyses were generated using IPA<sup>57</sup>. Mechanistic network analysis of transcriptome of IPSE pretreated mice compared to ifosfamide only mice showed downregulation of interactions between several proinflammatory genes. In addition to the network interaction between chemokines and interferon induced proteins, we also recorded more downregulatory mechanistic network interaction between genes encoding interferons induced proteins. Orange color signifies directional gene expression that is part of dataset, passed the cut off values and upregulated. Green color signifies directional gene expression that is part of dataset, passed the cut off values and downregulated. Gray color signifies gene expression that is part of dataset but unchanged. White color signifies genes that is not part of dataset. For other keys to the shape annotations, see description in Supplementary Fig. S2 legend.



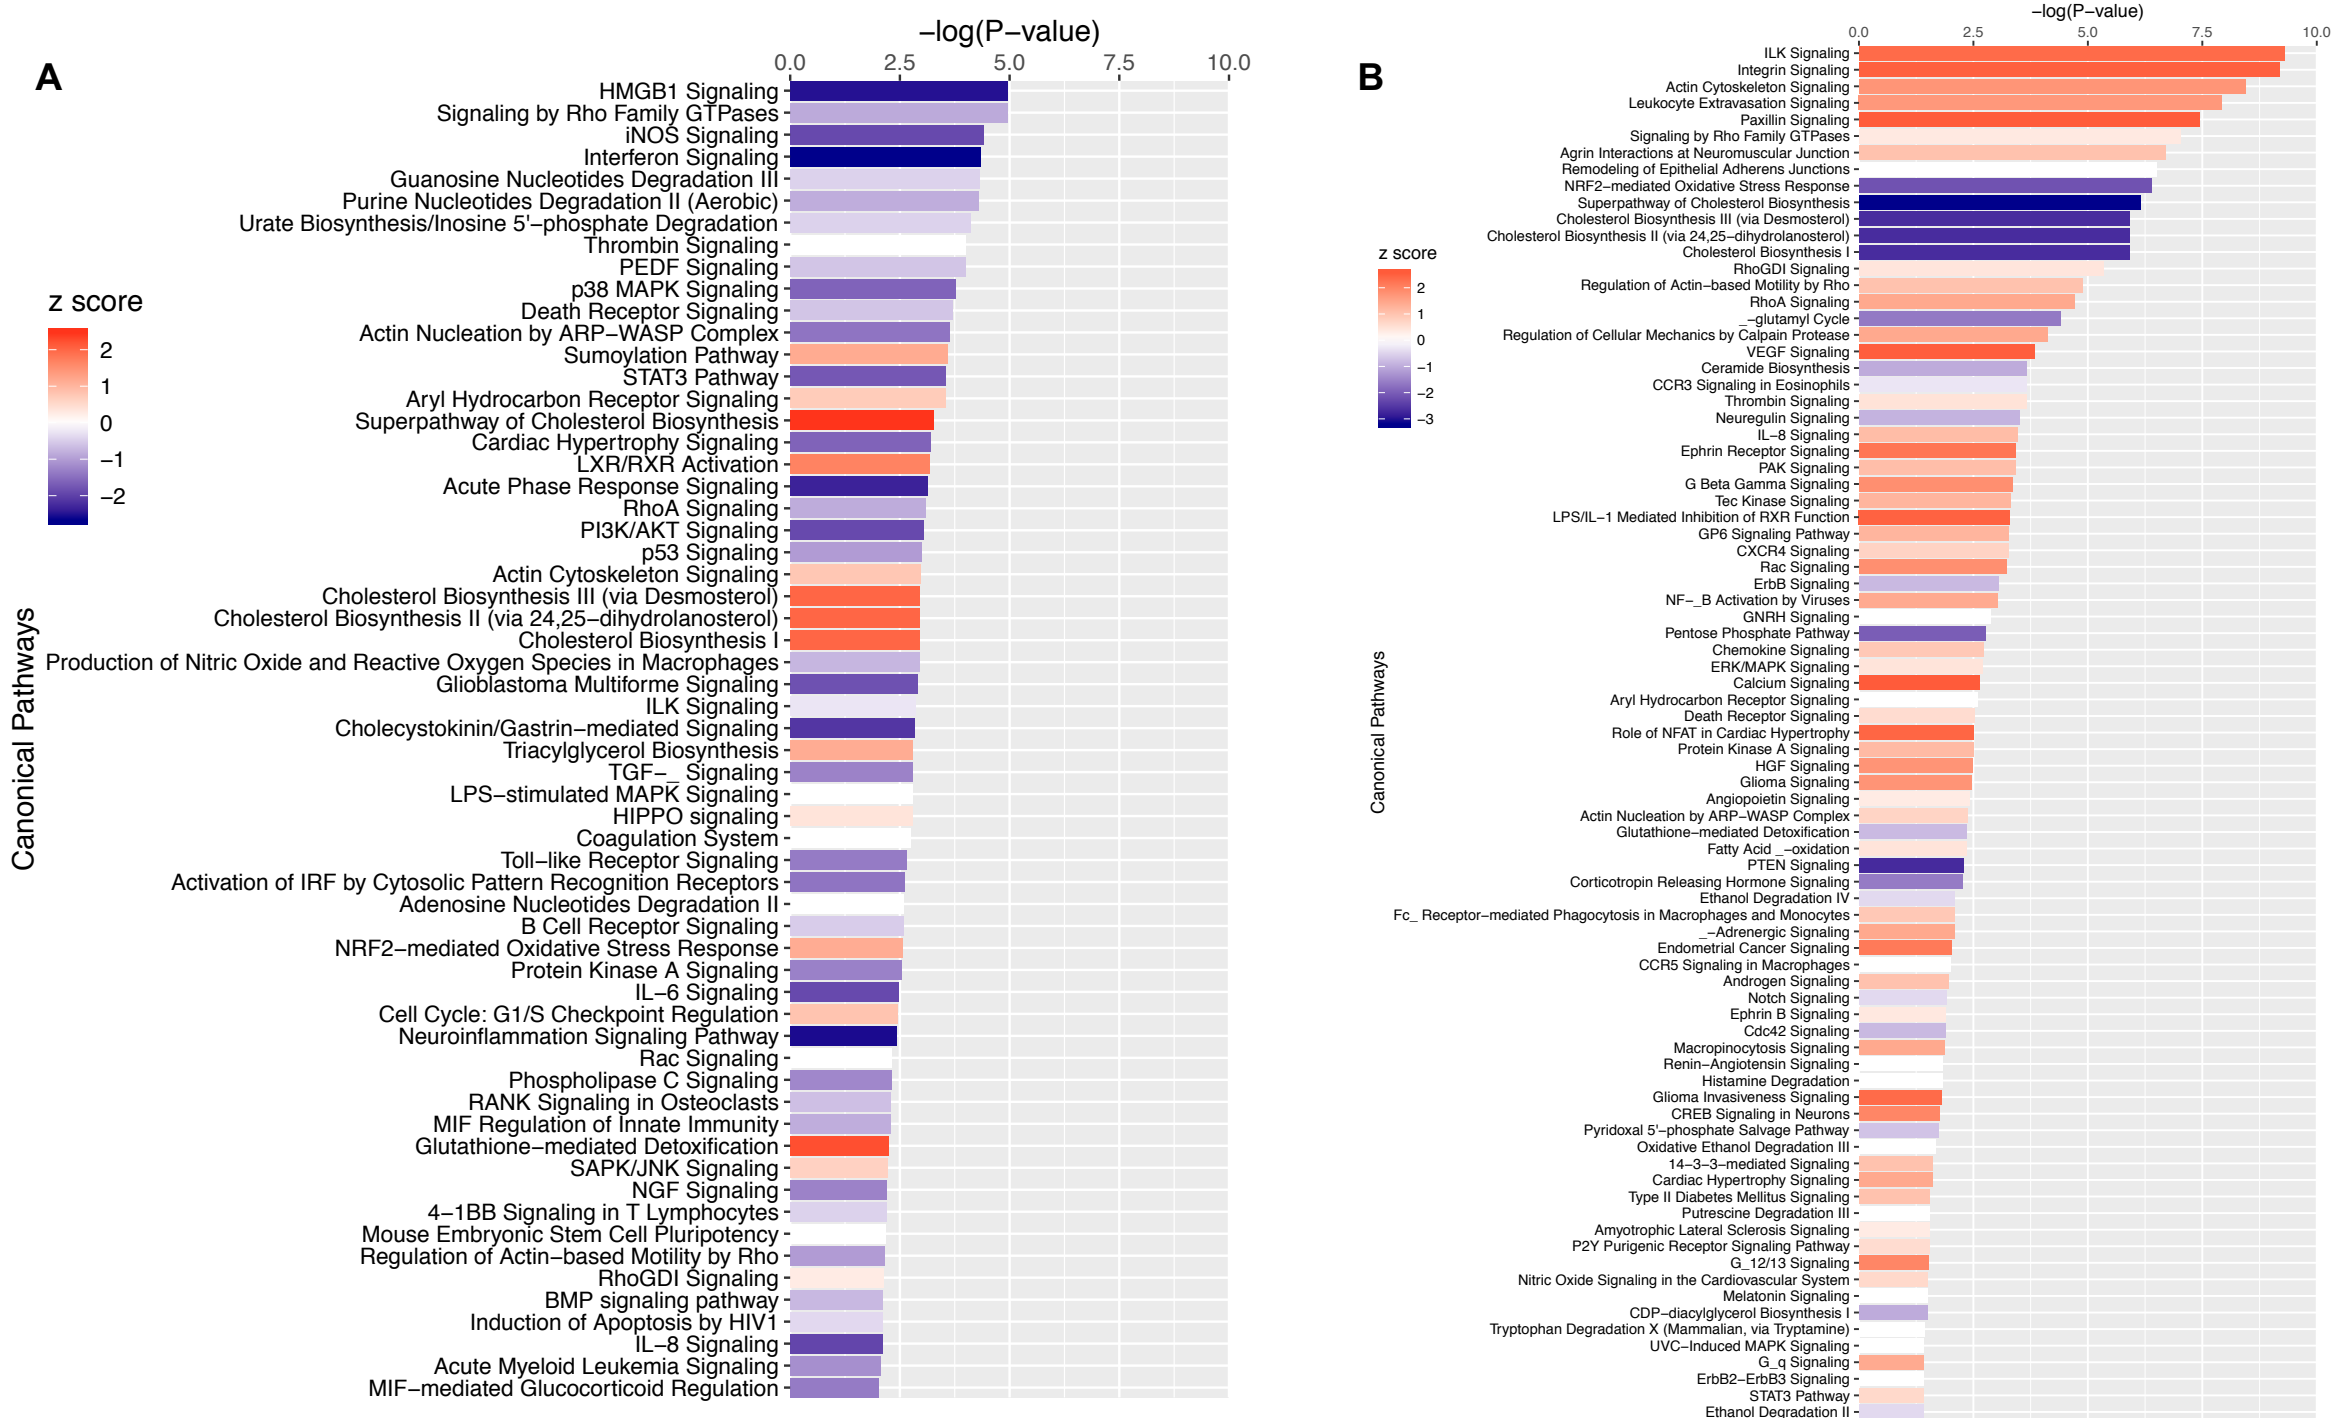

**Supplementary Fig. S5. Differentially altered pathways in bladders of mice challenged with ifosfamide with pretreatment with IPSE variants.** Mice were pretreated with saline, IPSE or IPSE NLS mutant, 24 hours before challenge with 400mg/kg of ifosfamide. The bladders were subjected to transcriptional profiling (RNA-Seq) and functional analysis using IPA<sup>57</sup>. (A) Differentially altered genes by pretreatment with IPSE NLS mutant compared to the ifosfamide only group. (B) Differentially altered genes by pretreatment with IPSE NLS mutant compared to pretreatment with wild type IPSE, both before ifosfamide challenge. Bars are colored according to z-score (predicts activation or inhibition based on the degree of overlap between directional expressions from observed data and the QIAGEN-curated public knowledge base), with red showing activation and blue denoting inhibition. The size of each bar is proportional to its  $-\log(p\text{-value})$ .

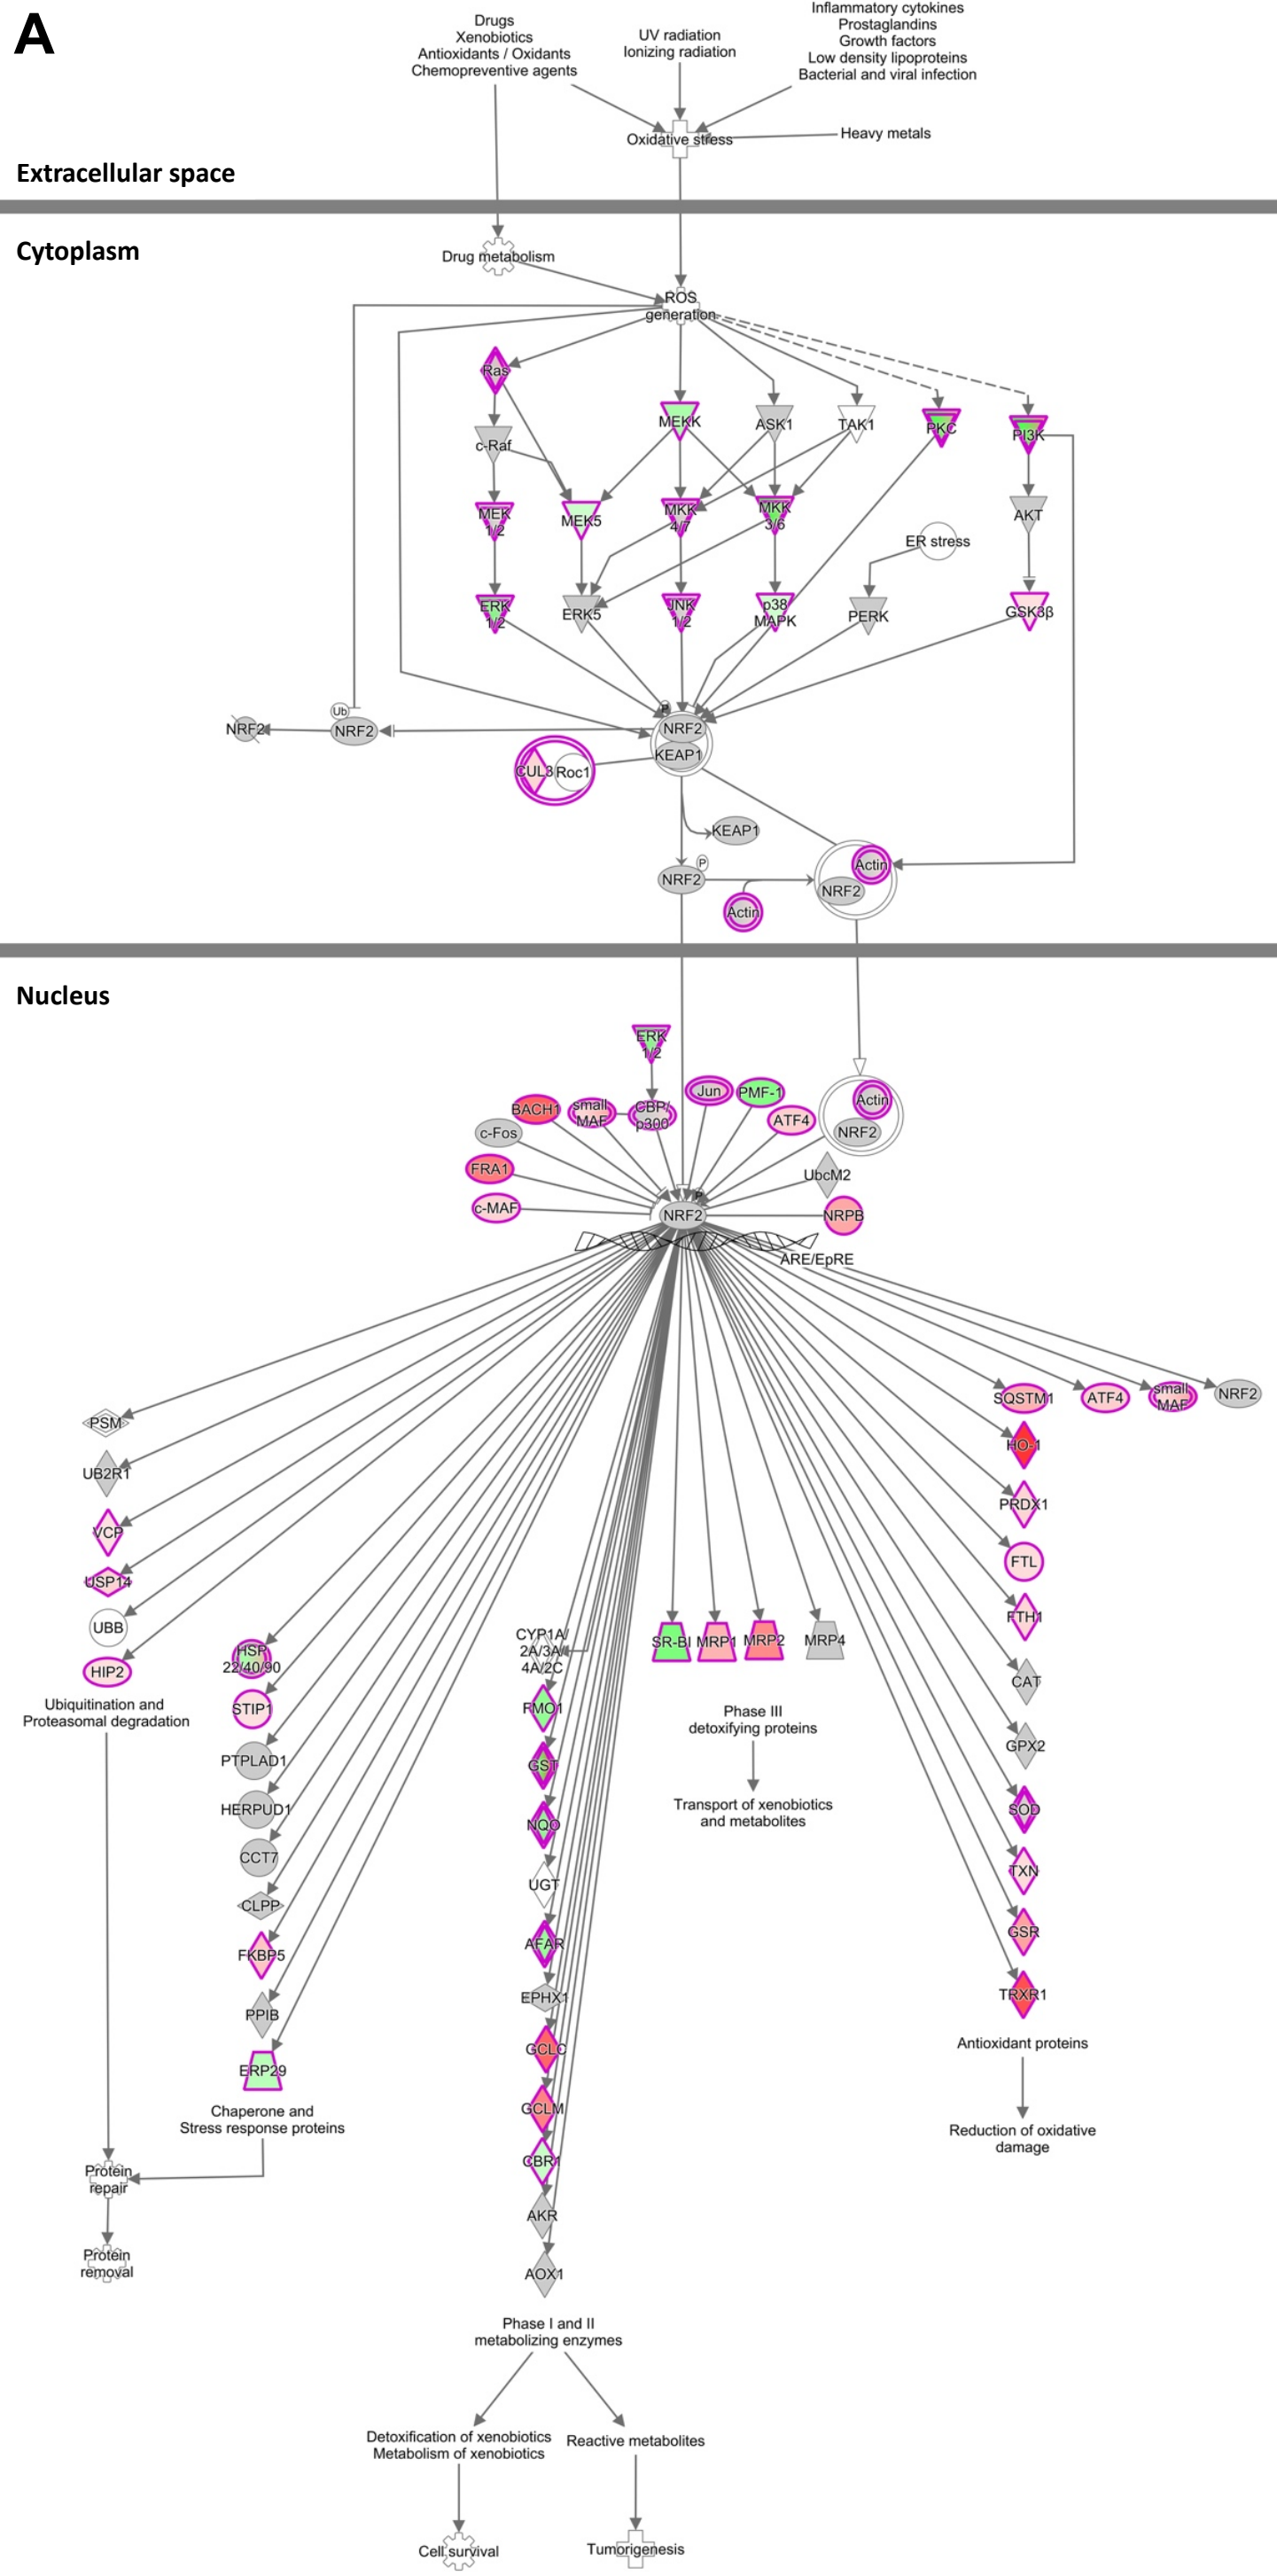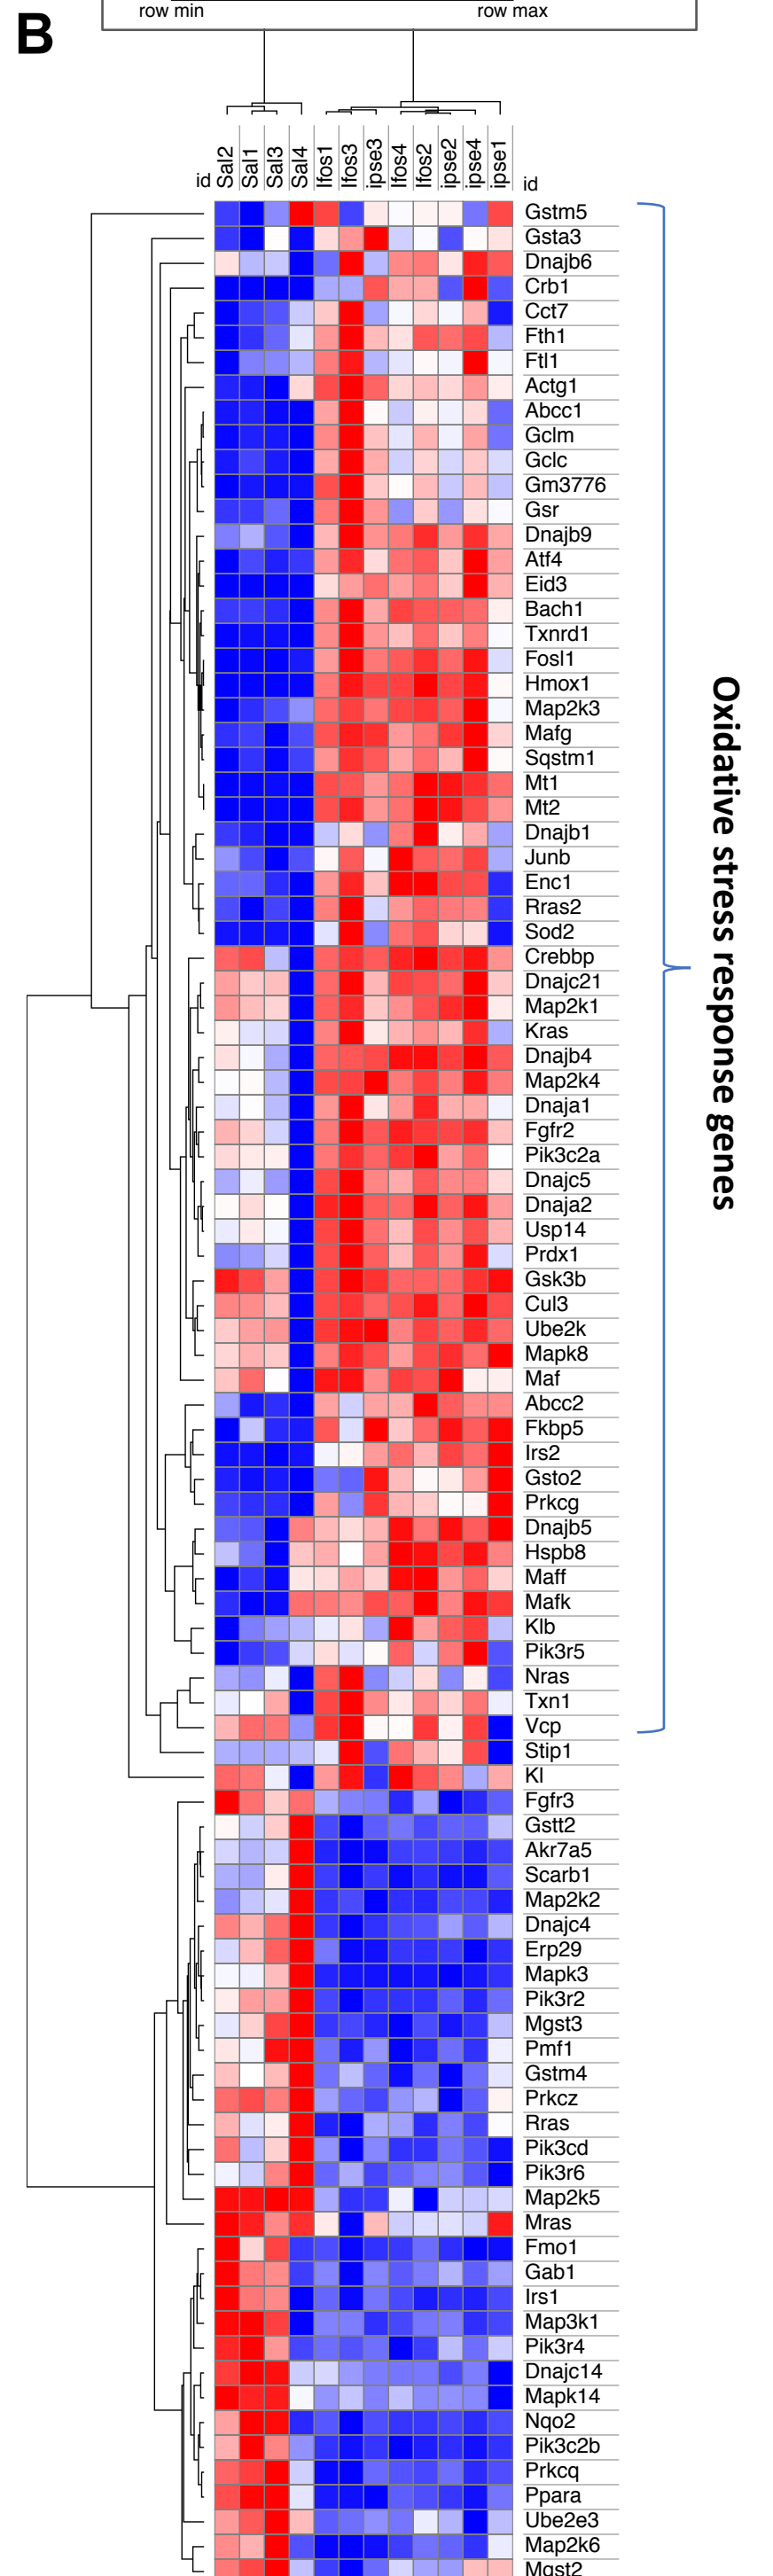

**Supplementary Fig. S6. NRF2 mediated oxidative stress responses pathway.** NRF2 is the major pathway regulating response to oxidative stress. It induces the expression of heme oxygenase pathway, the first enzyme of the heme homeostasis pathway, and the expression of several antioxidant enzymes and proteins. An abridged version of this figure is shown in Fig. 7. Pathways, Functional and Network analyses were generated using IPA<sup>57</sup>. For the key to the annotations, see description in Supplementary Fig. S2 legend.

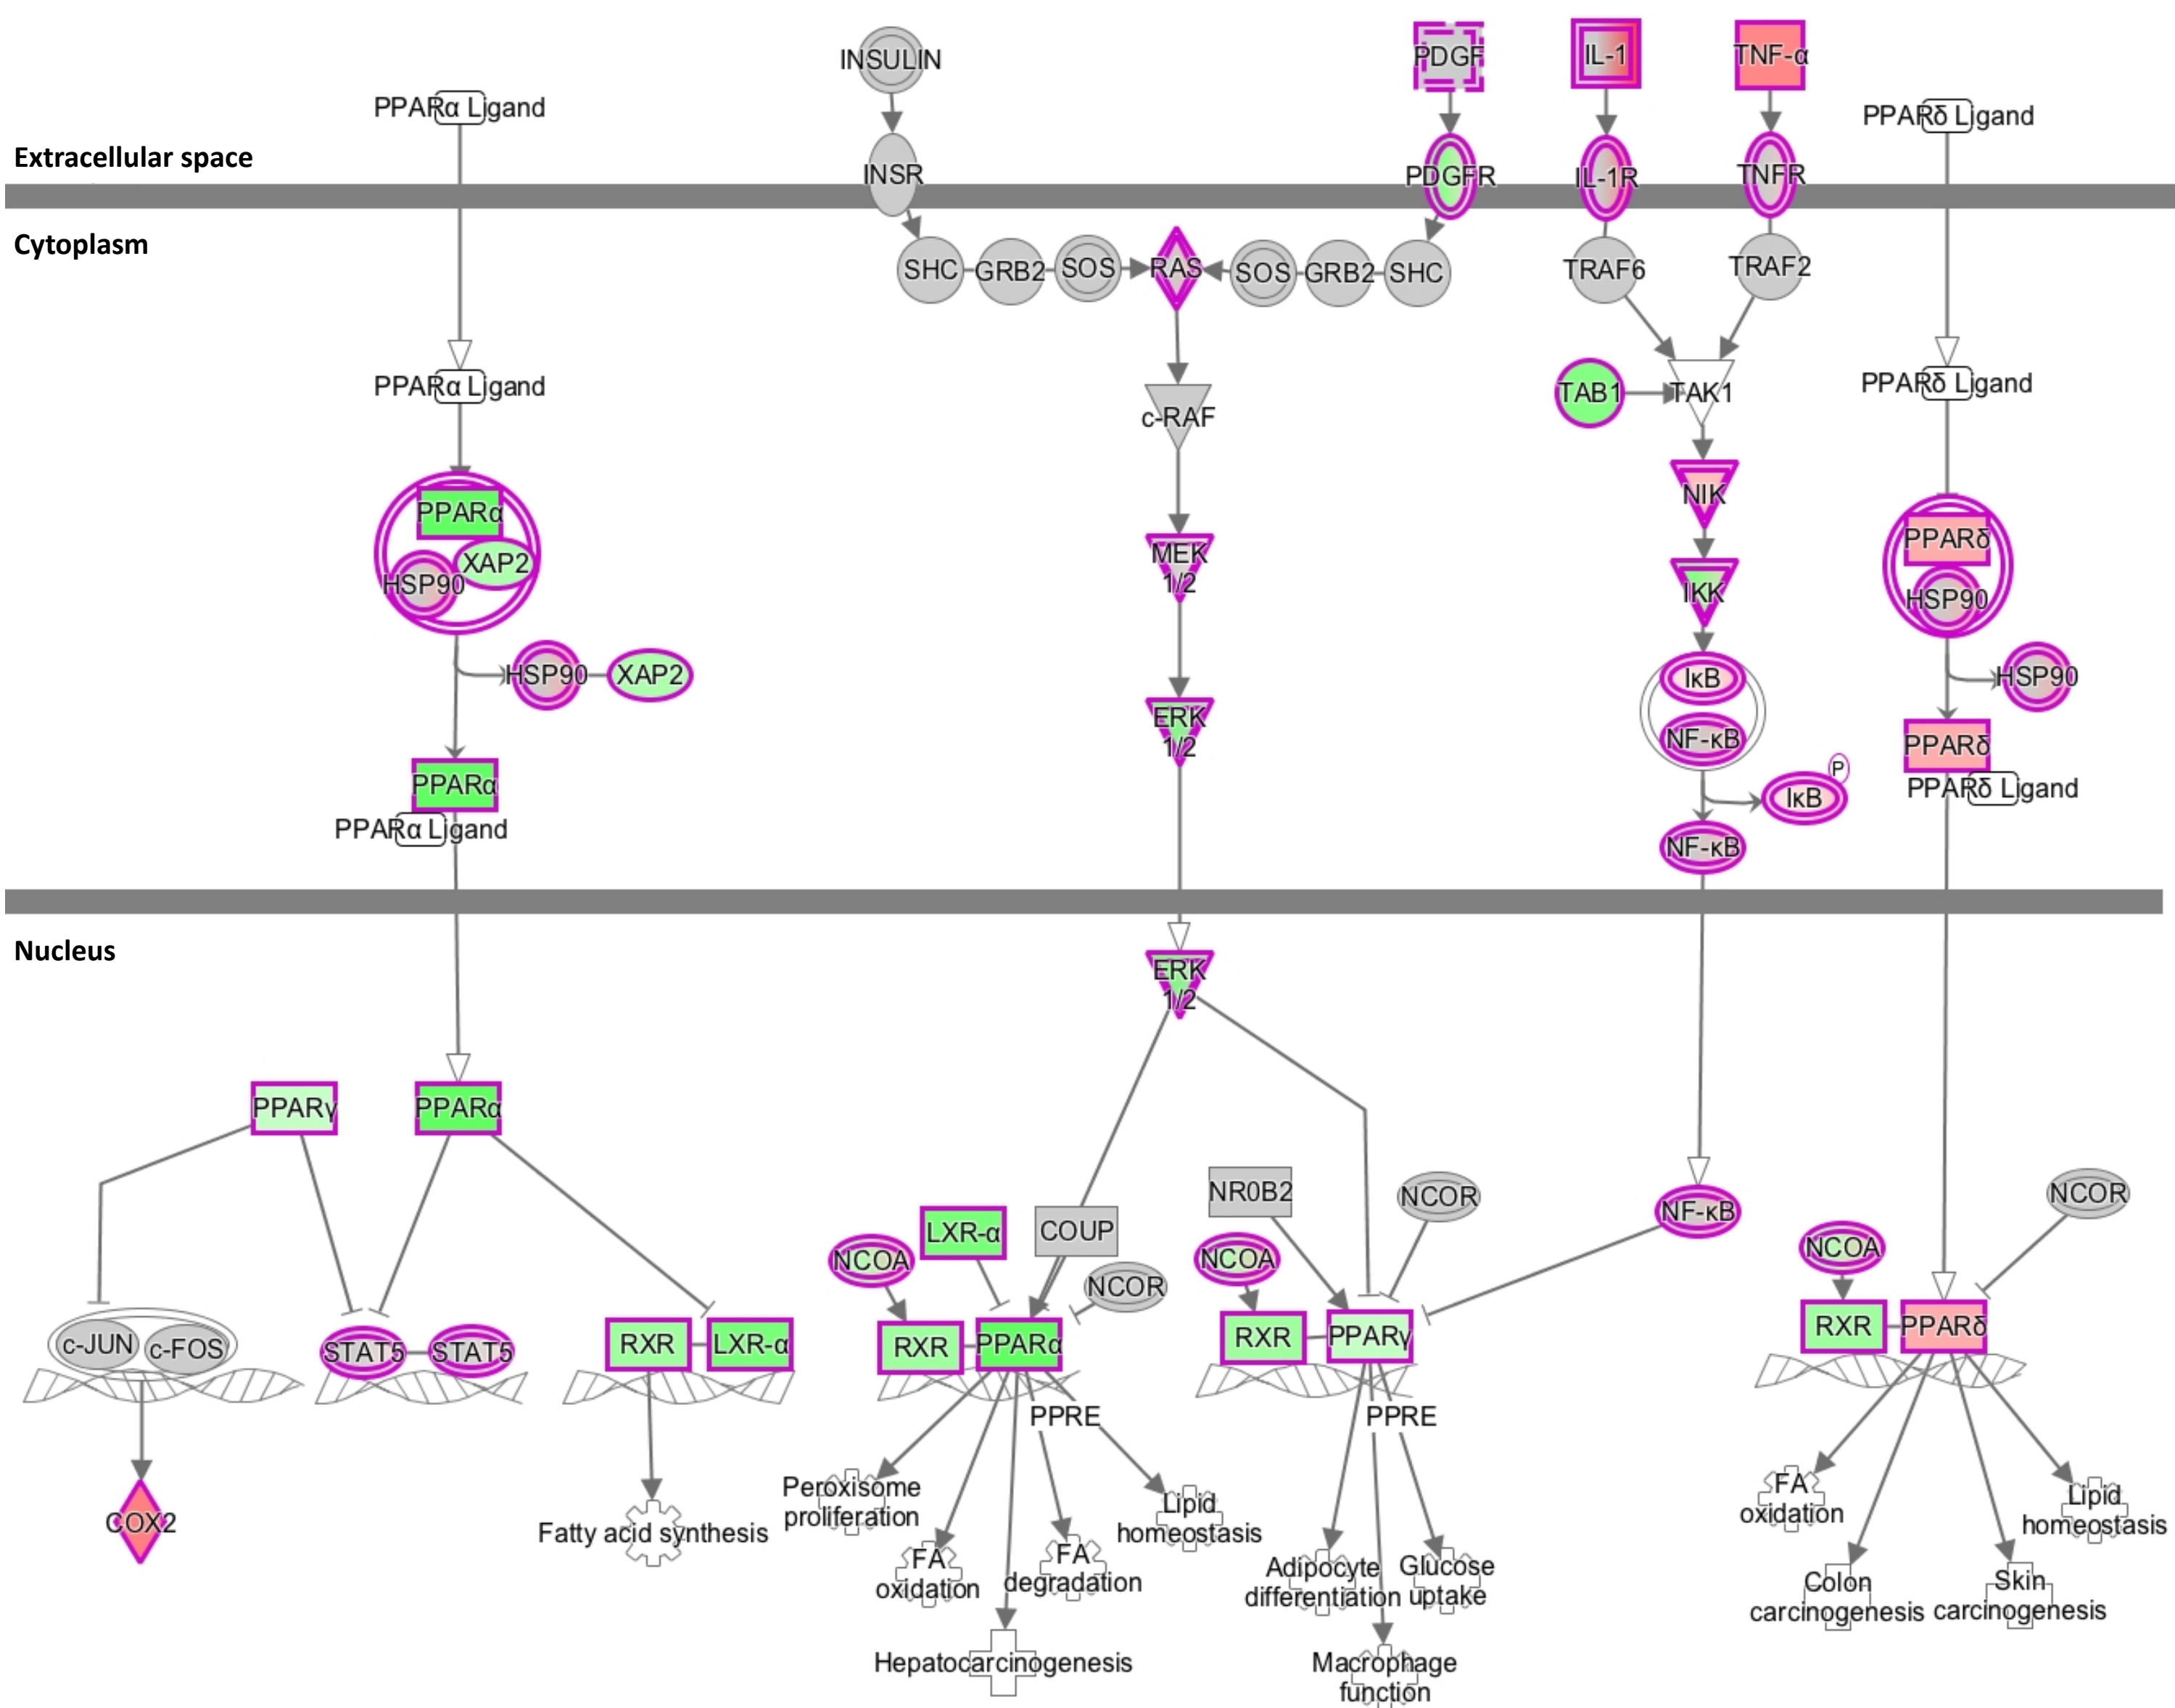

**Supplementary Fig. S7. PPAR signaling pathway.** PPAR cascade is the major pathway regulating lipid homeostasis. PPAR has been shown to play an anti-inflammatory role<sup>44</sup>, thus, here downregulated in response to ifosfamide induced cystitis. Pathways, Functional and Network analyses were generated using IPA<sup>57</sup>. For the key to the annotations, see description in Supplementary Fig. S2 legend.

## Organismal injury and disability

## Cancer

## Gastrointestinal disease

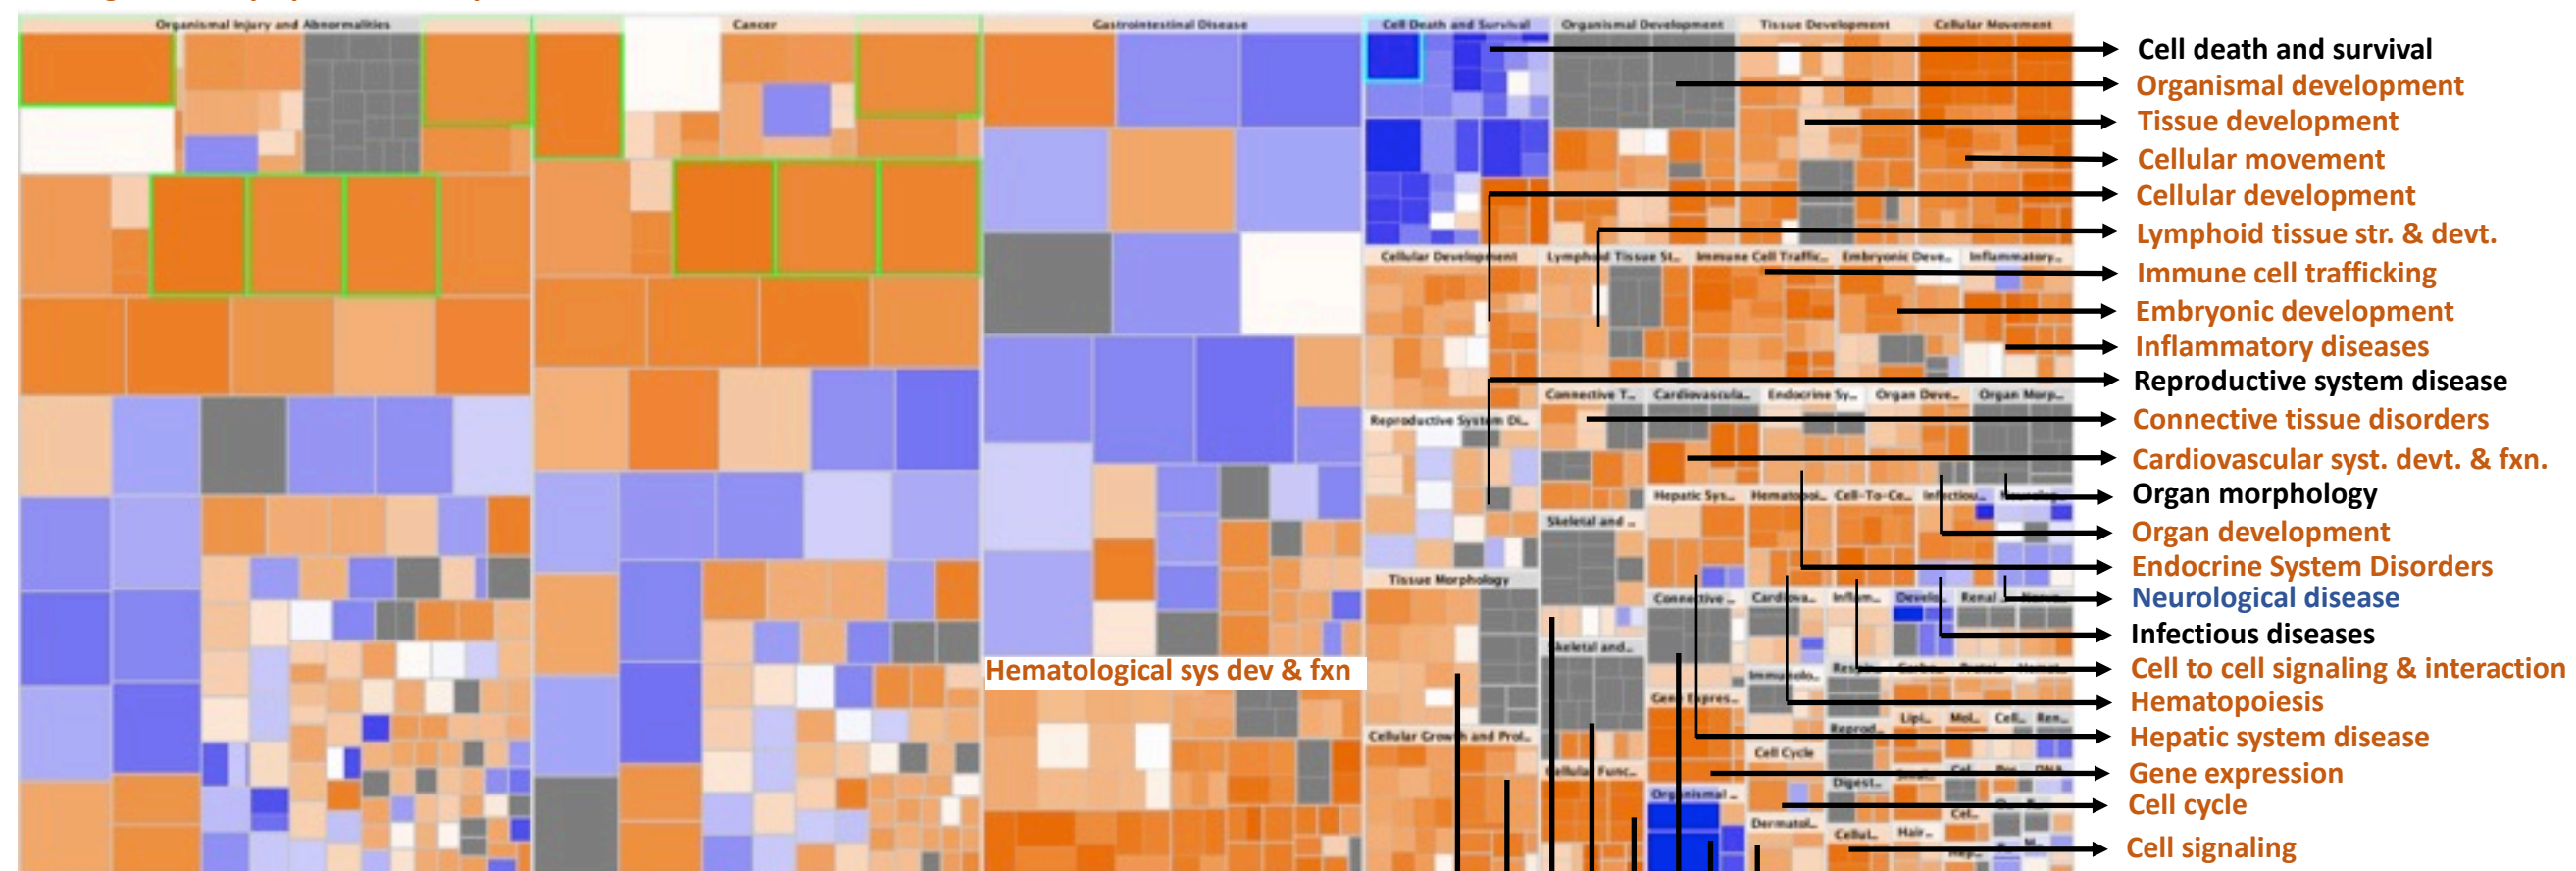

© 2000-2018 QIAGEN. All rights reserved.

- Cardiovascular disease
- Inflammatory responses
- Developmental disorder
- Renal and urologic disease
- Nervous system devt and fxn
- Immunological disease
- Respiratory disease
- Carbohydrate metabolism
- Protein synthesis
- Hepatic system disease
- Hair and skin devt and fxn
- Psychological disorder
- Metabolic disease

- Hematologic disease
- Reproductive system devt and fxn
- Lipid metabolism
- Molecular transport
- Respiratory system devt. & fxn.
- Digestive system devt. & fxn.
- Small molecule biochemistry
- Cell-med immune response
- Post translational modification
- DNA replication, recomb and repair
- Cell morphology
- Organismal functions
- Hepatic system devt. and fxn.

- Cell death and survival
- Organismal development
- Tissue development
- Cellular movement
- Cellular development
- Lymphoid tissue str. & devt.
- Immune cell trafficking
- Embryonic development
- Inflammatory diseases
- Reproductive system disease
- Connective tissue disorders
- Cardiovascular syst. devt. & fxn.
- Organ morphology
- Organ development
- Endocrine System Disorders
- Neurological disease
- Infectious diseases
- Cell to cell signaling & interaction
- Hematopoiesis
- Hepatic system disease
- Gene expression
- Cell cycle
- Cell signaling
- Dermatological diseases & condition
- Organismal survival
- Connective tissue devt. & fxn.
- Cellular functions
- Skeletal and muscular disorders
- Skeletal and muscular system devt. & fxn.
- Cellular growth & proliferation
- Tissue morphology

**Label Keys**

- Net Upregulation
- Net Downregulation
- Unchanged

**Supplementary Fig. S8. Diseases and Function Tree map.** This is a graphical representation of changes in the diseases and disorders, molecular and cellular functions, physiological system development and functions altered due to ifosfamide induced cystitis. We saw high upregulation of functions related to organismal injury and abnormalities, inflammatory diseases, cancer, cell proliferation, cellular movement and hematological systems development and function, and downregulation of cell death in response to ifosfamide induced cystitis. Pathways, Functional and Network analyses were generated using IPA<sup>57</sup>.

Neuroinflammation involves numerous cell types, acts to clear neuronal damage, and plays a key role in maintaining the homeostasis of CNS. Homeostasis can be lost through various regulatory failures, or when humoral immune components cross the blood-brain barrier, causing chronic inflammation with excessive cell and tissue damage, which is associated with neurodegenerative diseases.

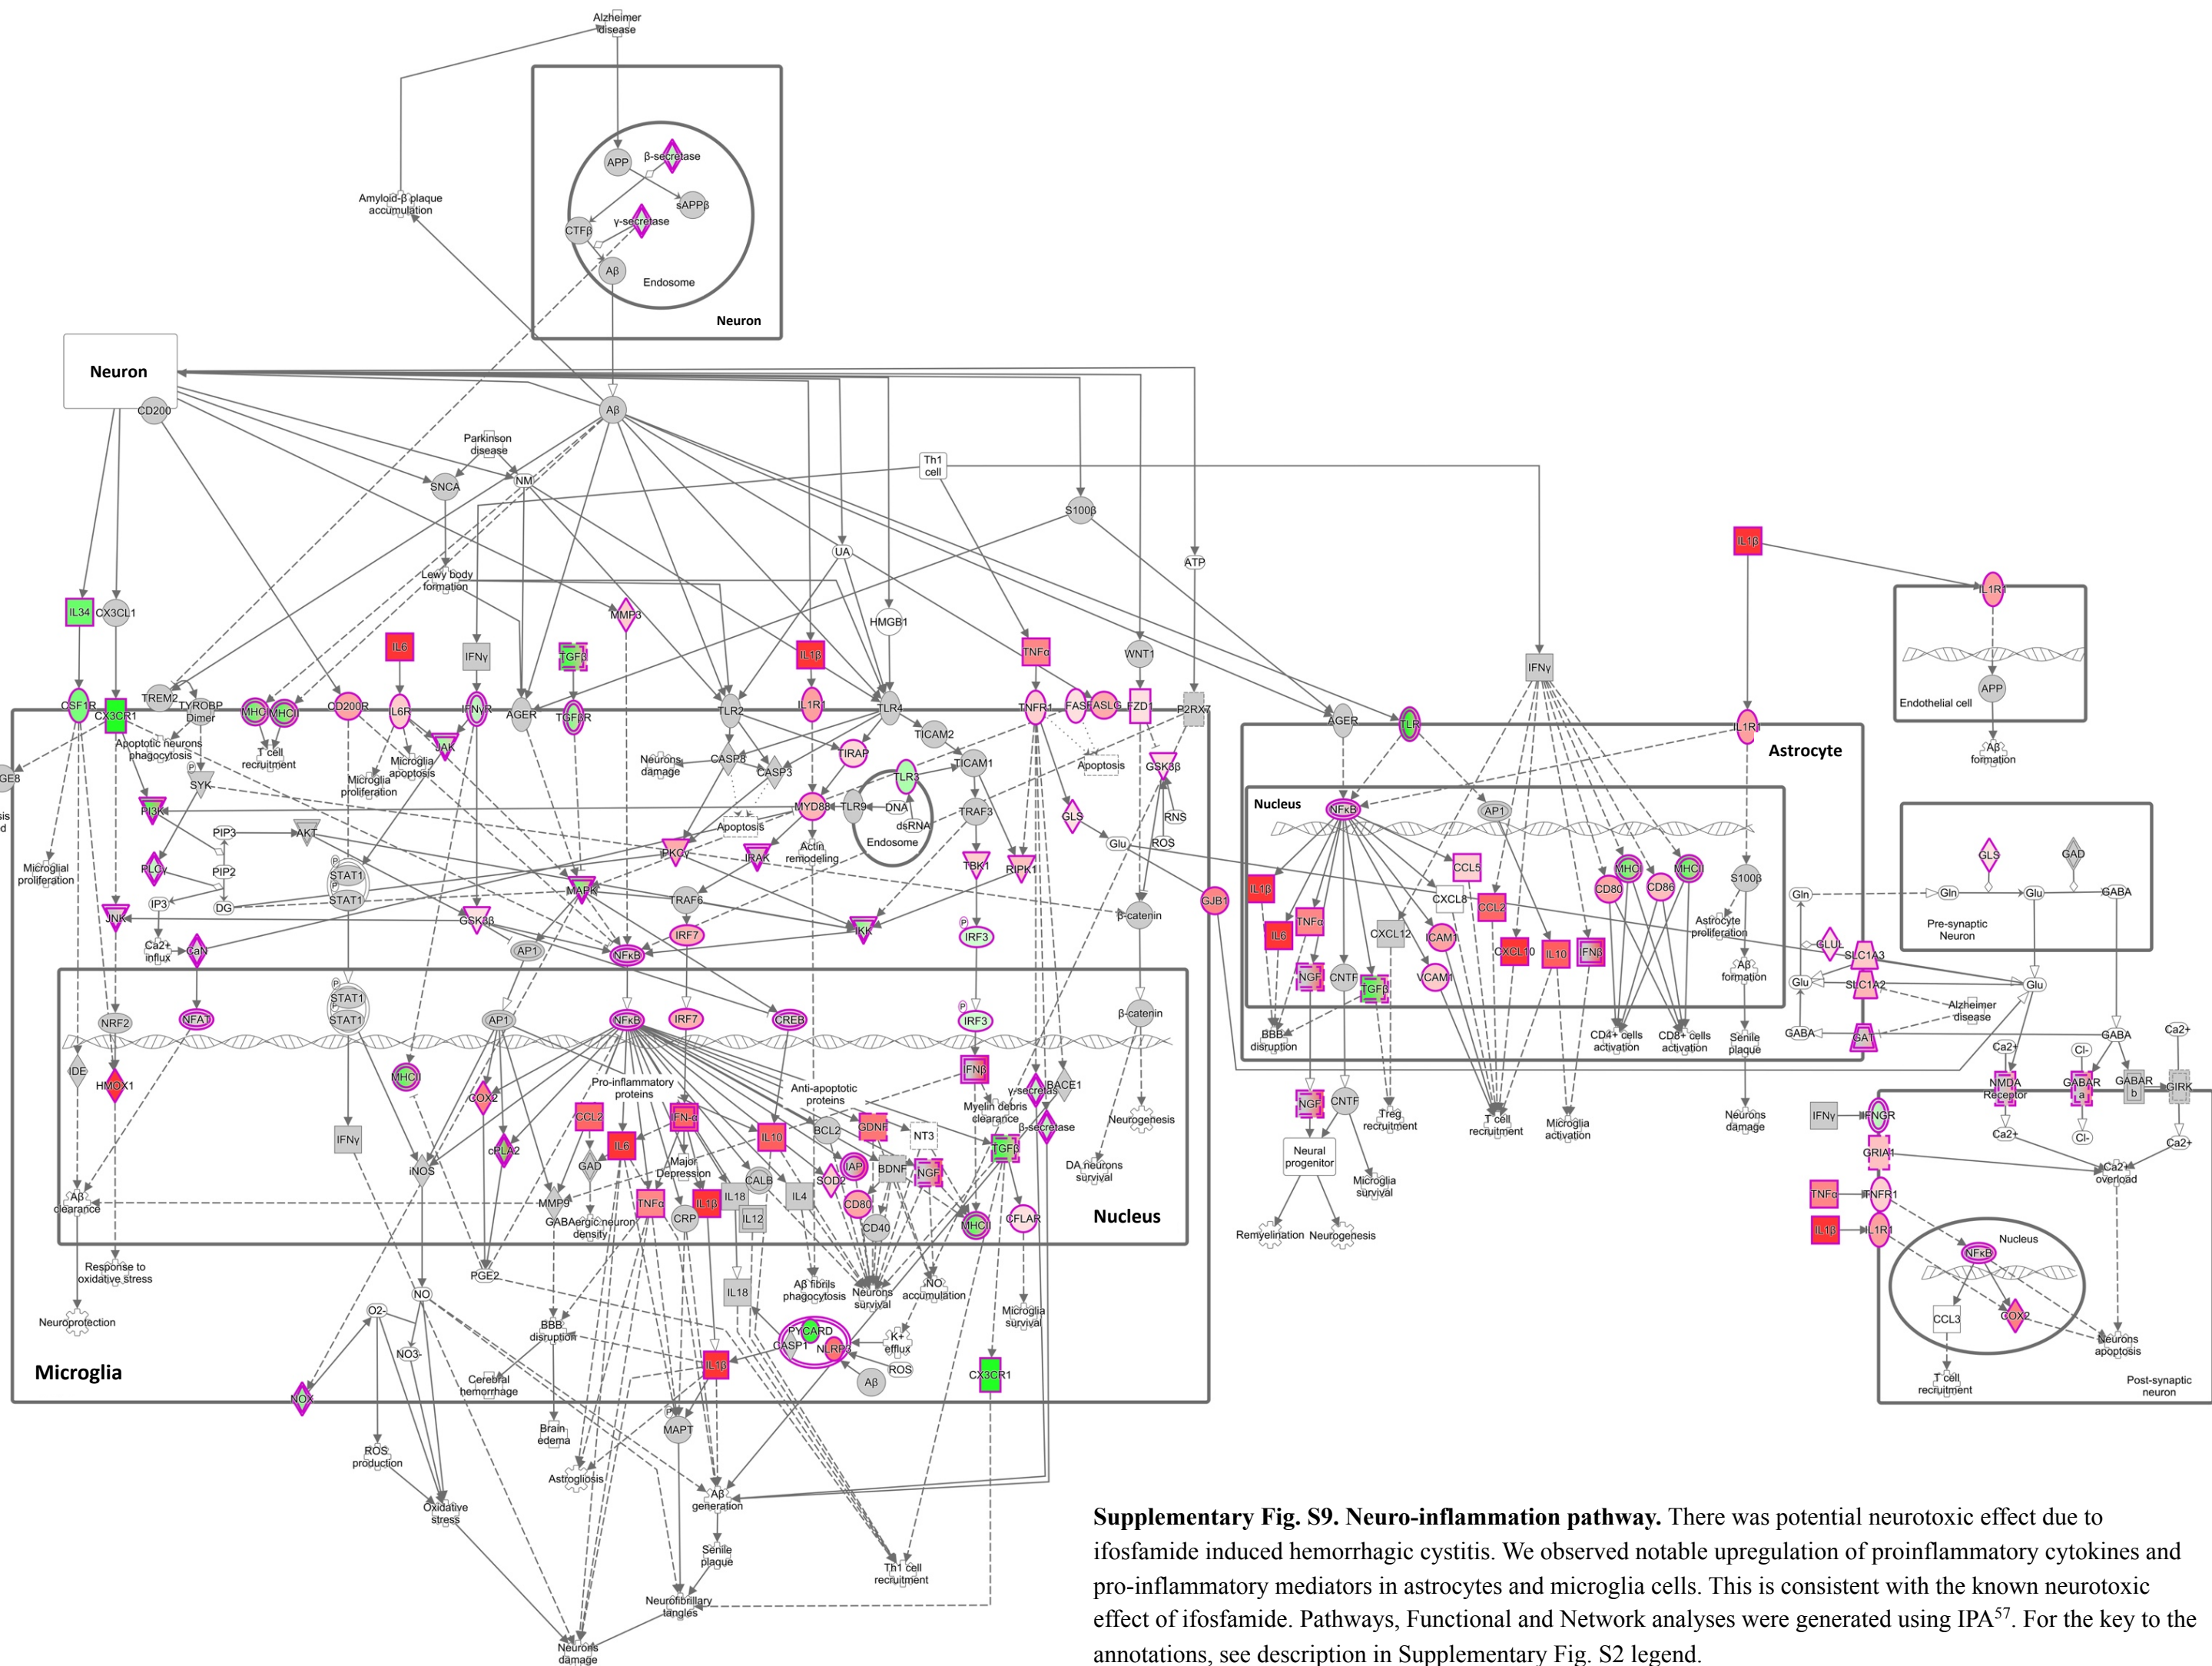

**Supplementary Fig. S9. Neuro-inflammation pathway.** There was potential neurotoxic effect due to ifosfamide induced hemorrhagic cystitis. We observed notable upregulation of proinflammatory cytokines and pro-inflammatory mediators in astrocytes and microglia cells. This is consistent with the known neurotoxic effect of ifosfamide. Pathways, Functional and Network analyses were generated using IPA<sup>57</sup>. For the key to the annotations, see description in Supplementary Fig. S2 legend.

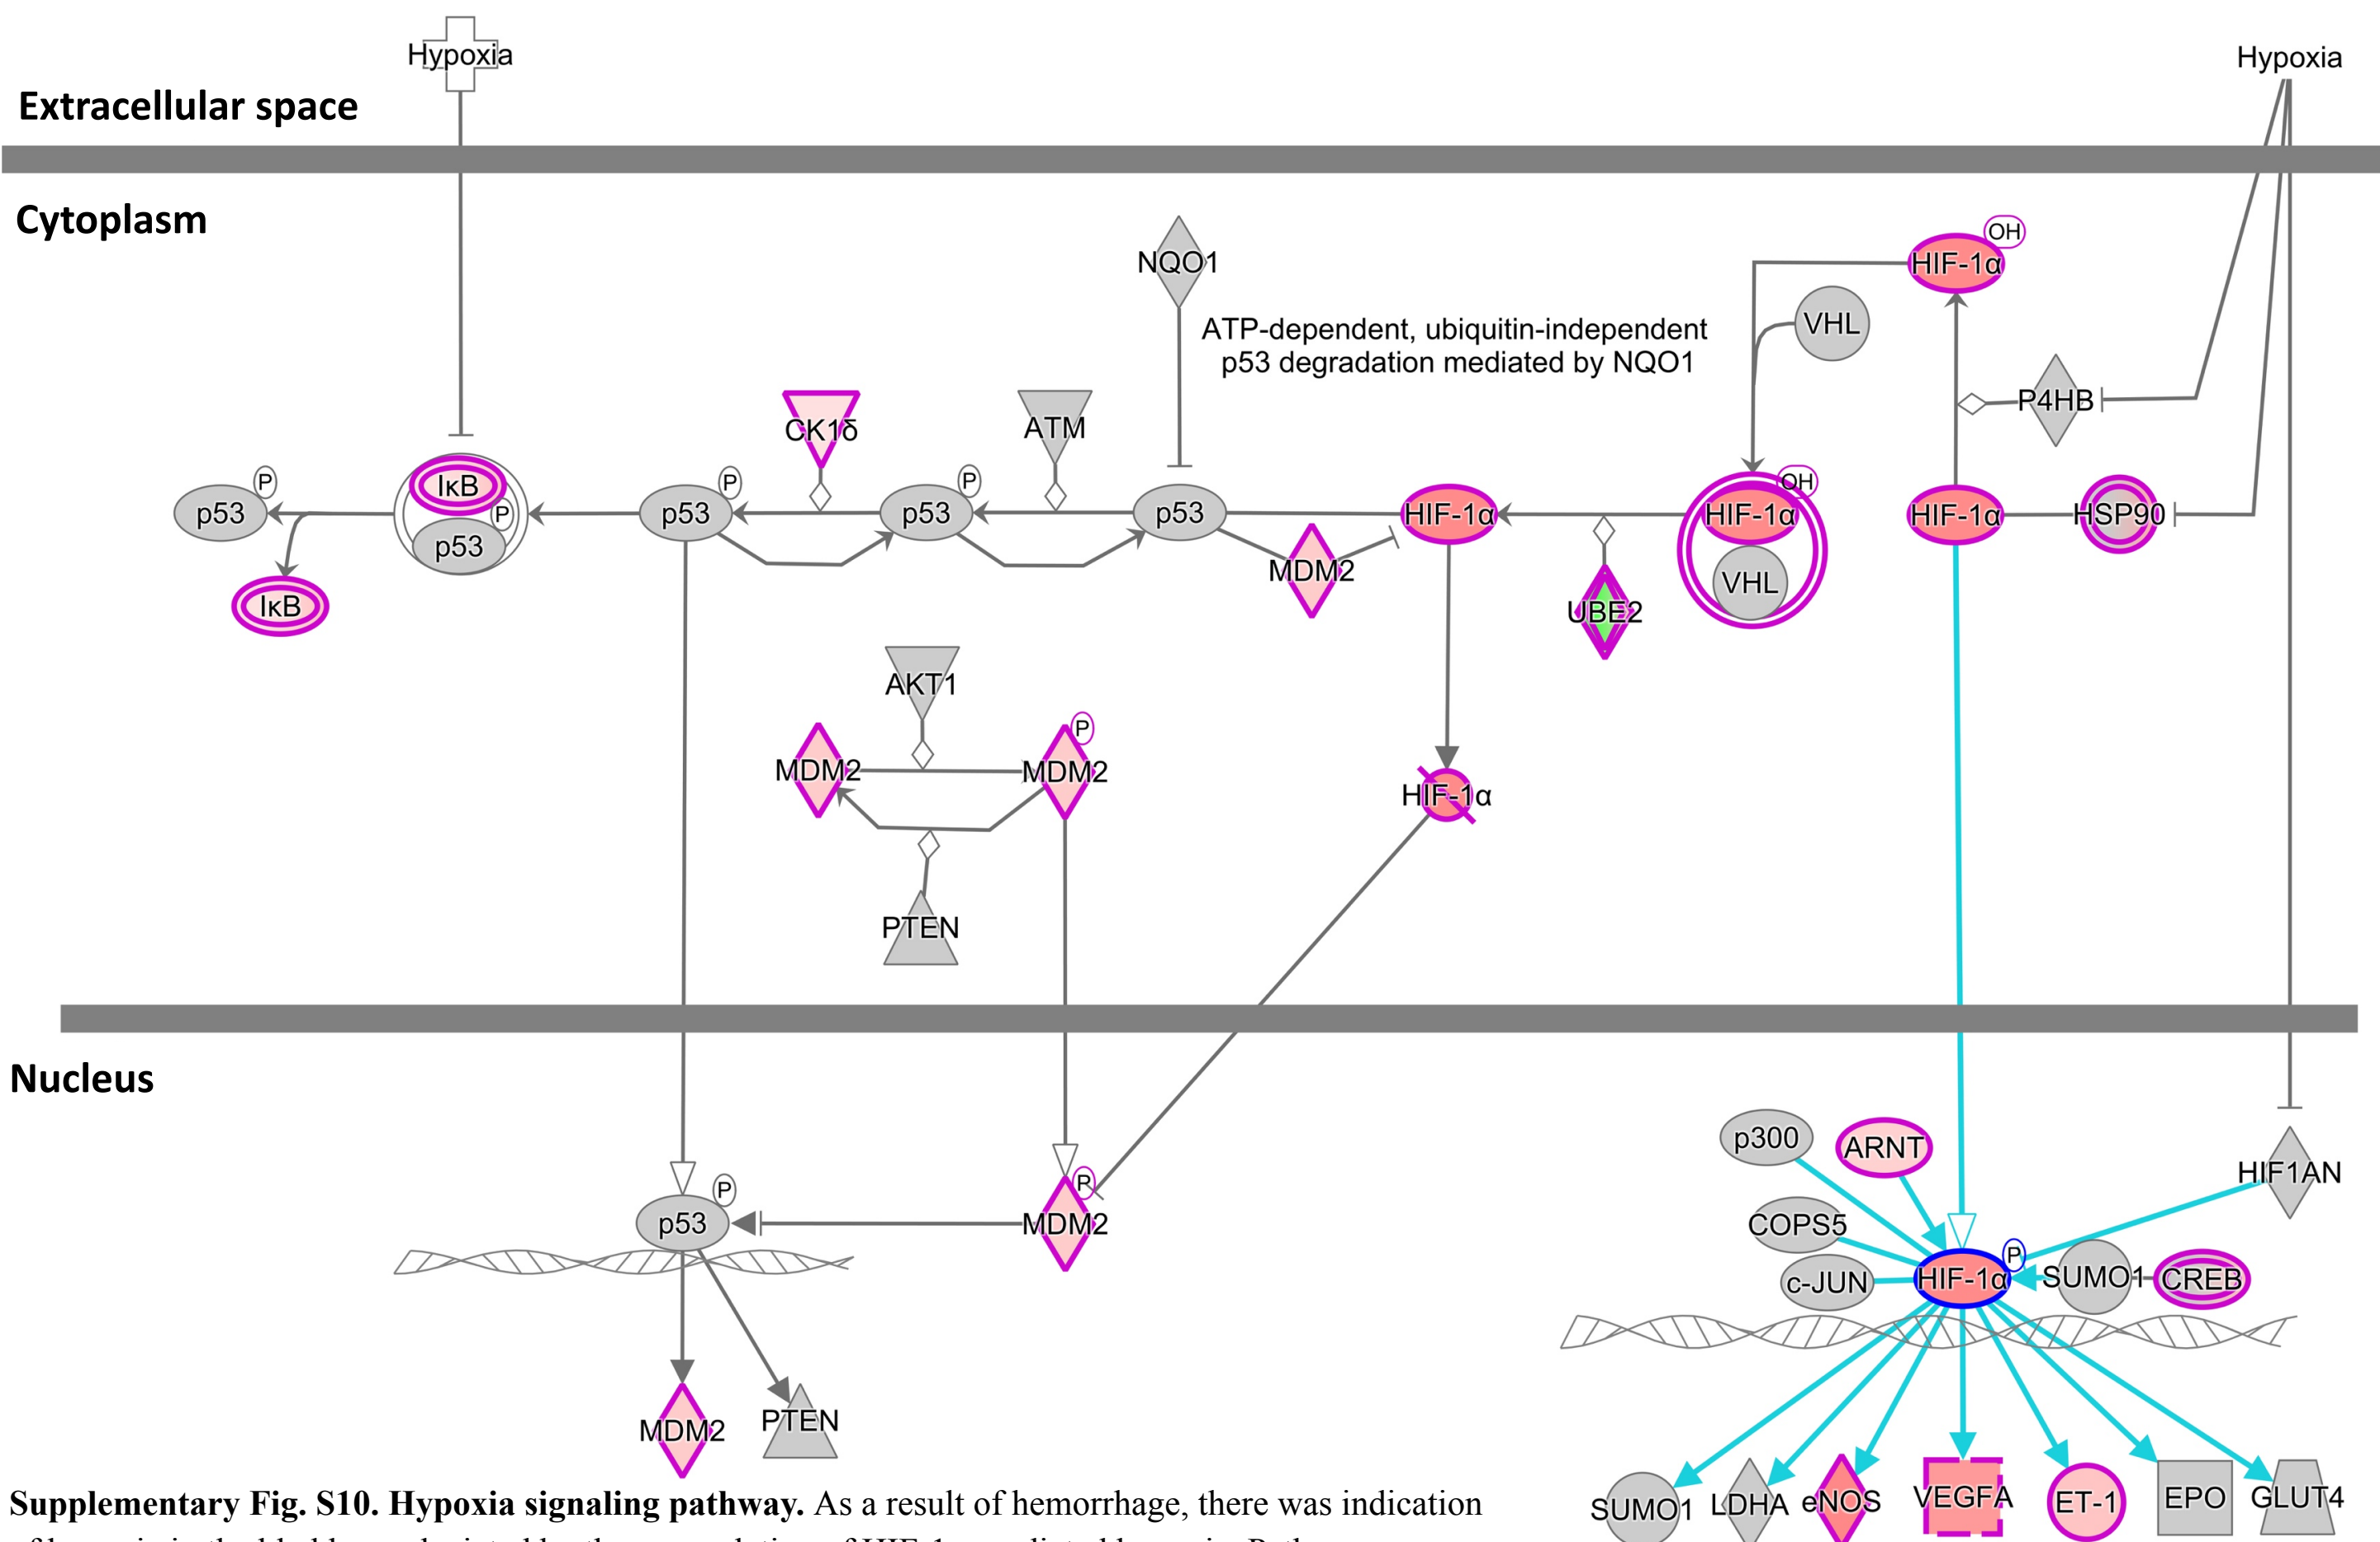

**Supplementary Fig. S10. Hypoxia signaling pathway.** As a result of hemorrhage, there was indication of hypoxia in the bladder as depicted by the upregulation of HIF-1 $\alpha$  mediated hypoxia. Pathways, Functional and Network analyses were generated using IPA<sup>57</sup>. For the key to the annotations, see description in Supplementary Fig. S2 legend.
